# Supplementary material for: From eggs to bites: do ovitrap data provide reliable estimates of Aedes albopictus biting females?
Source: PeerJ journal article supplement (doi:10.7717/peerj.2998), 2017-03-16
Supplement: Supplementary_Table_2.pdf [file Supplementary_Table_2.pdf]

Table S2. Result of Model-II ranking by AICc

| Model Formula                                                                                     | AICc   | RSME |
|---------------------------------------------------------------------------------------------------|--------|------|
| HLC ~ 1 + Eggs/site/day +Site+ Temperature + Temperature^2 + Rain lag 2 +Wind                     | 500.66 | 6.90 |
| HLC ~ 1 + Eggs/site/day +Wind                                                                     | 500.93 | 9.11 |
| HLC ~ 1 + Eggs/site/day                                                                           | 501.25 | 9.40 |
| HLC ~ 1 + Eggs/site/day +Site+ Temperature + Temperature^2 + Rain lag 3+Wind                      | 501.32 | 7.19 |
| HLC ~ 1 + Eggs/site/day + Rain Index                                                              | 501.62 | 9.28 |
| HLC ~ 1 + Eggs/site/day + Temperature + Temperature^2 +Wind                                       | 501.78 | 8.36 |
| HLC ~ 1 + Eggs/site/day +Site+Wind                                                                | 501.89 | 8.77 |
| HLC ~ 1 + Eggs/site/day + Rain lag 1 +Wind                                                        | 501.92 | 9.31 |
| HLC ~ 1 + Eggs/site/day + Temperature                                                             | 501.93 | 9.49 |
| HLC ~ 1 + Eggs/site/day + Temperature + Temperature^2                                             | 501.94 | 8.90 |
| HLC ~ 1 + Eggs/site/day + Temperature lag 1+ Temperature lag 1^2 +Wind                            | 502.03 | 8.23 |
| HLC ~ 1 + Eggs/site/day + Temperature + Rain lag 1                                                | 502.03 | 9.86 |
| HLC ~ 1 + Eggs/site/day + Temperature + Temperature^2 + Rain lag 3+Wind                           | 502.11 | 7.70 |
| HLC ~ 1 + Eggs/site/day + Rain lag 1                                                              | 502.16 | 9.59 |
| HLC ~ 1 + Eggs/site/day +Site+ Temperature + Temperature^2 +Wind                                  | 502.21 | 7.96 |
| HLC ~ 1 + Eggs/site/day + Temperature + Temperature^2 + Rain Index                                | 502.23 | 8.56 |
| HLC ~ 1 + Eggs/site/day +Site                                                                     | 502.26 | 9.07 |
| HLC ~ 1 + Eggs/site/day +Site+ Temperature lag 1+ Temperature lag 1^2 +Wind                       | 502.42 | 7.84 |
| HLC ~ 1 + Eggs/site/day + Rain Index +Wind                                                        | 502.55 | 9.09 |
| HLC ~ 1 + Eggs/site/day +Site+ Rain Index                                                         | 502.62 | 8.94 |
| HLC ~ 1 + Eggs/site/day +Site+ Temperature + Temperature^2 + Rain lag 2 + Rain lag 2^2 +Wind      | 502.81 | 6.85 |
| HLC ~ 1 + Eggs/site/day +Site+ Temperature + Temperature^2 + Rain Index                           | 502.82 | 8.17 |
| HLC ~ 1 + Eggs/site/day + Temperature +Wind                                                       | 502.83 | 9.20 |
| HLC ~ 1 + Eggs/site/day +Site+ Temperature + Temperature^2                                        | 502.84 | 8.56 |
| HLC ~ 1 + Eggs/site/day + Temperature lag 1 +Wind                                                 | 502.88 | 9.16 |
| HLC ~ 1 + Eggs/site/day + Temperature + Temperature^2 + Rain lag 2 +Wind                          | 502.91 | 7.79 |
| HLC ~ 1 + Eggs/site/day + Eggs/site/day:Site+Site+ Temperature + Temperature^2 + Rain lag 2 +Wind | 502.97 | 6.99 |
| HLC ~ 1 + Eggs/site/day + Temperature + Temperature^2 + Rain lag 1                                | 502.97 | 9.44 |
| HLC ~ 1 + Eggs/site/day + Temperature + Rain Index                                                | 503.01 | 9.34 |
| HLC ~ 1 + Eggs/site/day +Site+ Rain lag 1 +Wind                                                   | 503.02 | 8.98 |
| HLC ~ 1 + Eggs/site/day +Site+ Temperature                                                        | 503.11 | 9.17 |
| HLC ~ 1 + Eggs/site/day + Temperature + Temperature^2 + Rain Index +Wind                          | 503.11 | 8.21 |
| HLC ~ 1 + Eggs/site/day + Temperature lag 3 +Wind                                                 | 503.14 | 9.10 |
| HLC ~ 1 + Eggs/site/day + Temperature lag 1+ Temperature lag 1^2                                  | 503.17 | 8.60 |
| HLC ~ 1 + Eggs/site/day + Temperature lag 3                                                       | 503.27 | 9.38 |
| HLC ~ 1 + Eggs/site/day + Temperature lag 2 +Wind                                                 | 503.27 | 9.12 |
| HLC ~ 1 + Eggs/site/day + Rain lag 3+Wind                                                         | 503.28 | 9.20 |
| HLC ~ 1 + Eggs/site/day +Site+ Rain lag 1                                                         | 503.29 | 9.27 |
| HLC ~ 1 + Eggs/site/day + Rain lag 2 +Wind                                                        | 503.30 | 9.16 |
| HLC ~ 1 + Eggs/site/day +Site+ Temperature + Temperature^2 + Rain Index +Wind                     | 503.37 | 7.77 |
| HLC ~ 1 + Eggs/site/day + Temperature lag 1                                                       | 503.39 | 9.43 |
| HLC ~ 1 + Eggs/site/day + Temperature + Rain lag 1 +Wind                                          | 503.39 | 9.56 |

|                                                                                                  |        |      |
|--------------------------------------------------------------------------------------------------|--------|------|
| HLC ~ 1 + Eggs/site/day + Temperature lag 2                                                      | 503.39 | 9.39 |
| HLC ~ 1 + Eggs/site/day +Site+ Temperature + Rain lag 1                                          | 503.40 | 9.58 |
| HLC ~ 1 + Eggs/site/day + Temperature + Temperature^2 + Rain lag 3                               | 503.48 | 8.51 |
| HLC ~ 1 + Eggs/site/day + Rain lag 3                                                             | 503.49 | 9.51 |
| HLC ~ 1 + Eggs/site/day +Site+ Rain Index +Wind                                                  | 503.55 | 8.74 |
| HLC ~ 1 + Eggs/site/day + Rain lag 2                                                             | 503.55 | 9.46 |
| HLC ~ 1 + Eggs/site/day + Eggs/site/day:Site+Site+ Temperature + Temperature^2 + Rain lag 3+Wind | 503.57 | 7.19 |
| HLC ~ 1 + Eggs/site/day + Temperature lag 1 + Rain Index                                         | 503.60 | 9.32 |
| HLC ~ 1 + Eggs/site/day + Temperature + Temperature^2 + Rain lag 1 +Wind                         | 503.64 | 8.86 |
| HLC ~ 1 + Eggs/site/day +Site+ Temperature lag 1+ Temperature lag 1^2 + Rain lag 2 +Wind         | 503.67 | 7.50 |
| HLC ~ 1 + Eggs/site/day +Site+ Temperature lag 1+ Temperature lag 1^2                            | 503.74 | 8.23 |
| HLC ~ 1 + Eggs/site/day + Rain lag 1 + Rain lag 1^2 +Wind                                        | 503.79 | 9.19 |
| HLC ~ 1 + Eggs/site/day + Temperature lag 3 + Rain Index                                         | 503.80 | 9.26 |
| HLC ~ 1 + Eggs/site/day + Temperature lag 1+ Temperature lag 1^2 + Rain lag 2 +Wind              | 503.89 | 7.96 |
| HLC ~ 1 + Eggs/site/day + Temperature lag 1 + Rain lag 1 +Wind                                   | 503.93 | 9.38 |
| HLC ~ 1 + Eggs/site/day + Temperature lag 2 + Rain Index                                         | 503.93 | 9.27 |
| HLC ~ 1 + Eggs/site/day + Eggs/site/day:Site+Site+Wind                                           | 503.93 | 8.75 |
| HLC ~ 1 + Eggs/site/day +Site+ Temperature +Wind                                                 | 503.94 | 8.87 |
| HLC ~ 1 + Eggs/site/day +Site+ Temperature lag 1 +Wind                                           | 503.96 | 8.82 |
| HLC ~ 1 + Eggs/site/day +Site+ Temperature + Temperature^2 + Rain lag 3                          | 503.97 | 8.14 |
| HLC ~ 1 + Eggs/site/day +Site+ Temperature + Temperature^2 + Rain lag 3 + Rain lag 3^2+Wind      | 503.97 | 7.19 |
| HLC ~ 1 + Eggs/site/day + Rain lag 1 + Rain lag 1^2                                              | 504.01 | 9.47 |
| HLC ~ 1 + Eggs/site/day + Temperature lag 1+ Temperature lag 1^2 + Rain lag 3+Wind               | 504.01 | 8.03 |
| HLC ~ 1 + Eggs/site/day +Site+ Temperature lag 1+ Temperature lag 1^2 + Rain lag 3+Wind          | 504.03 | 7.61 |
| HLC ~ 1 + Eggs/site/day + Temperature lag 2+ Temperature lag 2^2 +Wind                           | 504.05 | 8.66 |
| HLC ~ 1 + Eggs/site/day + Temperature lag 1+ Temperature lag 1^2 + Rain lag 1 +Wind              | 504.05 | 8.50 |
| HLC ~ 1 + Eggs/site/day + Eggs/site/day:Site+Site                                                | 504.10 | 9.04 |
| HLC ~ 1 + Eggs/site/day + Temperature lag 1+ Temperature lag 1^2 + Rain Index                    | 504.12 | 8.59 |
| HLC ~ 1 + Eggs/site/day + Temperature lag 3 + Rain lag 1 +Wind                                   | 504.14 | 9.30 |
| HLC ~ 1 + Eggs/site/day + Temperature lag 3 + Rain lag 1                                         | 504.15 | 9.57 |
| HLC ~ 1 + Eggs/site/day + Temperature + Temperature^2 + Rain lag 2                               | 504.15 | 8.79 |
| HLC ~ 1 + Eggs/site/day +Site+ Temperature + Rain Index                                          | 504.15 | 9.01 |
| HLC ~ 1 + Eggs/site/day +Site+ Temperature lag 3 +Wind                                           | 504.16 | 8.76 |
| HLC ~ 1 + Eggs/site/day +Site+ Temperature + Temperature^2 + Rain lag 1 + Rain lag 1^2 +Wind     | 504.21 | 7.70 |
| HLC ~ 1 + Eggs/site/day +Site+ Temperature + Temperature^2 + Rain lag 1                          | 504.23 | 9.16 |
| HLC ~ 1 + Eggs/site/day + Temperature lag 1+ Temperature lag 1^2 + Rain Index +Wind              | 504.23 | 8.26 |
| HLC ~ 1 + Eggs/site/day + Temperature + Rain lag 1 + Rain lag 1^2                                | 504.25 | 9.74 |
| HLC ~ 1 + Eggs/site/day + Eggs/site/day:Site+Site+ Temperature + Temperature^2 +Wind             | 504.25 | 7.91 |
| HLC ~ 1 + Eggs/site/day + Temperature + Rain lag 3                                               | 504.27 | 9.62 |
| HLC ~ 1 + Eggs/site/day + Temperature + Rain lag 2                                               | 504.27 | 9.65 |
| HLC ~ 1 + Eggs/site/day +Site+ Temperature lag 2 +Wind                                           | 504.30 | 8.78 |

|                                                                                                 |        |      |
|-------------------------------------------------------------------------------------------------|--------|------|
| HLC ~ 1 + Eggs/site/day + Temperature + Temperature^2 + Rain lag 1 + Rain lag 1^2 +Wind         | 504.32 | 8.20 |
| HLC ~ 1 + Eggs/site/day +Site+ Temperature lag 3                                                | 504.32 | 9.06 |
| HLC ~ 1 + Eggs/site/day +Site+ Rain lag 3+Wind                                                  | 504.33 | 8.87 |
| HLC ~ 1 + Eggs/site/day +Site+ Rain lag 2 +Wind                                                 | 504.33 | 8.83 |
| HLC ~ 1 + Eggs/site/day + Temperature lag 1 + Rain lag 1                                        | 504.36 | 9.63 |
| HLC ~ 1 + Eggs/site/day + Temperature lag 2 + Rain lag 1 +Wind                                  | 504.37 | 9.32 |
| HLC ~ 1 + Eggs/site/day + Temperature lag 3+ Temperature lag 3^2 +Wind                          | 504.40 | 8.73 |
| HLC ~ 1 + Eggs/site/day + Temperature lag 1 + Rain Index +Wind                                  | 504.42 | 9.14 |
| HLC ~ 1 + Eggs/site/day + Temperature lag 2 + Rain lag 1                                        | 504.44 | 9.57 |
| HLC ~ 1 + Eggs/site/day +Site+ Temperature lag 2                                                | 504.45 | 9.06 |
| HLC ~ 1 + Eggs/site/day +Site+ Temperature lag 1                                                | 504.50 | 9.11 |
| HLC ~ 1 + Eggs/site/day + Temperature + Temperature^2 + Rain lag 1 + Rain lag 1^2               | 504.52 | 9.02 |
| HLC ~ 1 + Eggs/site/day +Site+ Temperature + Temperature^2 + Rain lag 1 +Wind                   | 504.53 | 8.53 |
| HLC ~ 1 + Eggs/site/day + Temperature lag 2+ Temperature lag 2^2                                | 504.54 | 9.02 |
| HLC ~ 1 + Eggs/site/day + Eggs/site/day:Site+Site+ Temperature lag 1+ Temperature lag 1^2 +Wind | 504.58 | 7.81 |
| HLC ~ 1 + Eggs/site/day +Site+ Rain lag 3                                                       | 504.59 | 9.20 |
| HLC ~ 1 + Eggs/site/day + Temperature + Rain Index +Wind                                        | 504.61 | 9.16 |
| HLC ~ 1 + Eggs/site/day + Eggs/site/day:Site+Site+ Rain Index                                   | 504.64 | 8.92 |
| HLC ~ 1 + Eggs/site/day +Site+ Rain lag 2                                                       | 504.64 | 9.14 |
| HLC ~ 1 + Eggs/site/day + Temperature + Temperature^2 + Rain lag 3 + Rain lag 3^2+Wind          | 504.67 | 7.69 |
| HLC ~ 1 + Eggs/site/day +Site+ Temperature + Temperature^2 + Rain lag 2                         | 504.67 | 8.46 |
| HLC ~ 1 + Eggs/site/day +Site+ Temperature + Rain lag 1 +Wind                                   | 504.70 | 9.25 |
| HLC ~ 1 + Eggs/site/day +Site+ Temperature lag 1 + Rain Index                                   | 504.70 | 8.98 |
| HLC ~ 1 + Eggs/site/day +Site+ Temperature lag 1+ Temperature lag 1^2 + Rain Index +Wind        | 504.71 | 7.87 |
| HLC ~ 1 + Eggs/site/day +Site+ Temperature lag 1+ Temperature lag 1^2 + Rain lag 1 +Wind        | 504.72 | 8.14 |
| HLC ~ 1 + Eggs/site/day + Eggs/site/day:Site+Site+ Temperature + Temperature^2                  | 504.72 | 8.51 |
| HLC ~ 1 + Eggs/site/day +Site+ Temperature lag 1+ Temperature lag 1^2 + Rain Index              | 504.73 | 8.21 |
| HLC ~ 1 + Eggs/site/day +Site+ Temperature lag 2+ Temperature lag 2^2 +Wind                     | 504.83 | 8.32 |
| HLC ~ 1 + Eggs/site/day +Site+ Temperature lag 3 + Rain Index                                   | 504.85 | 8.92 |
| HLC ~ 1 + Eggs/site/day + Temperature lag 3+ Temperature lag 3^2                                | 504.85 | 9.08 |
| HLC ~ 1 + Eggs/site/day + Temperature lag 3 + Rain Index +Wind                                  | 504.86 | 9.08 |
| HLC ~ 1 + Eggs/site/day + Eggs/site/day:Site+Site+ Temperature + Temperature^2 + Rain Index     | 504.88 | 8.13 |
| HLC ~ 1 + Eggs/site/day +Site+ Rain lag 1 + Rain lag 1^2 +Wind                                  | 504.89 | 8.84 |
| HLC ~ 1 + Eggs/site/day + Temperature lag 1+ Temperature lag 1^2 + Rain lag 1                   | 504.98 | 8.88 |
| HLC ~ 1 + Eggs/site/day + Temperature lag 2 + Rain Index +Wind                                  | 504.98 | 9.10 |
| HLC ~ 1 + Eggs/site/day +Site+ Temperature lag 2 + Rain Index                                   | 504.98 | 8.93 |
| HLC ~ 1 + Eggs/site/day + Eggs/site/day:Site+Site+ Temperature                                  | 505.05 | 9.14 |
| HLC ~ 1 + Eggs/site/day + Temperature + Temperature^2 + Rain lag 2 + Rain lag 2^2 +Wind         | 505.13 | 7.69 |
| HLC ~ 1 + Eggs/site/day +Site+ Rain lag 1 + Rain lag 1^2                                        | 505.14 | 9.14 |
| HLC ~ 1 + Eggs/site/day +Site+ Temperature lag 1 + Rain lag 1 +Wind                             | 505.16 | 9.05 |

|                                                                                                                  |        |      |
|------------------------------------------------------------------------------------------------------------------|--------|------|
| HLC ~ 1 + Eggs/site/day +Site+ Temperature lag 1+ Temperature lag 1^2 + Rain lag 3 + Rain lag 3^2+Wind           | 505.18 | 7.34 |
| HLC ~ 1 + Eggs/site/day +Site+ Temperature lag 3+ Temperature lag 3^2 +Wind                                      | 505.21 | 8.39 |
| HLC ~ 1 + Eggs/site/day + Eggs/site/day:Site+Site+ Rain lag 1 +Wind                                              | 505.25 | 8.94 |
| HLC ~ 1 + Eggs/site/day + Temperature + Rain lag 3+Wind                                                          | 505.26 | 9.30 |
| HLC ~ 1 + Eggs/site/day + Temperature + Rain lag 2 +Wind                                                         | 505.27 | 9.31 |
| HLC ~ 1 + Eggs/site/day + Temperature lag 1+ Temperature lag 1^2 + Rain lag 2                                    | 505.27 | 8.45 |
| HLC ~ 1 + Eggs/site/day +Site+ Temperature lag 3 + Rain lag 1 +Wind                                              | 505.30 | 8.98 |
| HLC ~ 1 + Eggs/site/day + Eggs/site/day:Site+Site+ Rain lag 1                                                    | 505.33 | 9.23 |
| HLC ~ 1 + Eggs/site/day + Temperature lag 1 + Rain lag 2 +Wind                                                   | 505.33 | 9.23 |
| HLC ~ 1 + Eggs/site/day + Temperature lag 1 + Rain lag 3+Wind                                                    | 505.33 | 9.21 |
| HLC ~ 1 + Eggs/site/day +Site+ Temperature lag 3 + Rain lag 1                                                    | 505.33 | 9.27 |
| HLC ~ 1 + Eggs/site/day + Eggs/site/day:Site+Site+ Temperature + Temperature^2 + Rain lag 2 + Rain lag 2^2 +Wind | 505.33 | 6.92 |
| HLC ~ 1 + Eggs/site/day + Temperature lag 3+ Temperature lag 3^2 + Rain Index                                    | 505.36 | 8.93 |
| HLC ~ 1 + Eggs/site/day + Rain lag 3 + Rain lag 3^2+Wind                                                         | 505.40 | 9.10 |
| HLC ~ 1 + Eggs/site/day + Temperature lag 2+ Temperature lag 2^2 + Rain Index                                    | 505.41 | 8.93 |
| HLC ~ 1 + Eggs/site/day +Site+ Temperature lag 2+ Temperature lag 2^2                                            | 505.46 | 8.70 |
| HLC ~ 1 + Eggs/site/day + Temperature lag 1+ Temperature lag 1^2 + Rain lag 1 + Rain lag 1^2 +Wind               | 505.47 | 8.25 |
| HLC ~ 1 + Eggs/site/day + Temperature lag 1+ Temperature lag 1^2 + Rain lag 3                                    | 505.48 | 8.57 |
| HLC ~ 1 + Eggs/site/day +Site+ Temperature + Temperature^2 + Rain lag 1 + Rain lag 1^2                           | 505.49 | 8.71 |
| HLC ~ 1 + Eggs/site/day + Temperature lag 1+ Temperature lag 1^2 + Rain lag 3 + Rain lag 3^2+Wind                | 505.53 | 7.80 |
| HLC ~ 1 + Eggs/site/day +Site+ Temperature lag 2 + Rain lag 1 +Wind                                              | 505.54 | 9.00 |
| HLC ~ 1 + Eggs/site/day +Site+ Temperature + Rain lag 3                                                          | 505.54 | 9.33 |
| HLC ~ 1 + Eggs/site/day + Temperature + Rain lag 1 + Rain lag 1^2 +Wind                                          | 505.54 | 9.40 |
| HLC ~ 1 + Eggs/site/day +Site+ Temperature + Rain lag 2                                                          | 505.55 | 9.36 |
| HLC ~ 1 + Eggs/site/day + Eggs/site/day:Site+Site+ Temperature + Temperature^2 + Rain Index +Wind                | 505.55 | 7.73 |
| HLC ~ 1 + Eggs/site/day +Site+ Temperature lag 1 + Rain Index +Wind                                              | 505.56 | 8.80 |
| HLC ~ 1 + Eggs/site/day + Temperature lag 3 + Rain lag 3+Wind                                                    | 505.57 | 9.22 |
| HLC ~ 1 + Eggs/site/day + Temperature lag 3 + Rain lag 3                                                         | 505.58 | 9.52 |
| HLC ~ 1 + Eggs/site/day +Site+ Temperature lag 1+ Temperature lag 1^2 + Rain lag 2                               | 505.58 | 8.06 |
| HLC ~ 1 + Eggs/site/day +Site+ Temperature lag 1 + Rain lag 1                                                    | 505.59 | 9.32 |
| HLC ~ 1 + Eggs/site/day + Eggs/site/day:Site+Site+ Temperature + Rain lag 1                                      | 505.59 | 9.53 |
| HLC ~ 1 + Eggs/site/day + Temperature lag 3 + Rain lag 2 +Wind                                                   | 505.60 | 9.17 |
| HLC ~ 1 + Eggs/site/day +Site+ Temperature lag 2 + Rain lag 1                                                    | 505.62 | 9.26 |
| HLC ~ 1 + Eggs/site/day +Site+ Temperature + Rain lag 1 + Rain lag 1^2                                           | 505.62 | 9.45 |
| HLC ~ 1 + Eggs/site/day + Temperature lag 3 + Rain lag 2                                                         | 505.64 | 9.45 |
| HLC ~ 1 + Eggs/site/day + Eggs/site/day:Site+Site+ Temperature lag 1+ Temperature lag 1^2                        | 505.67 | 8.19 |
| HLC ~ 1 + Eggs/site/day + Temperature lag 2 + Rain lag 3                                                         | 505.69 | 9.52 |
| HLC ~ 1 + Eggs/site/day + Temperature lag 2 + Rain lag 3+Wind                                                    | 505.70 | 9.22 |
| HLC ~ 1 + Eggs/site/day + Eggs/site/day:Site+Site+ Rain Index +Wind                                              | 505.71 | 8.73 |
| HLC ~ 1 + Eggs/site/day + Rain lag 2 + Rain lag 2^2                                                              | 505.72 | 9.40 |
| HLC ~ 1 + Eggs/site/day + Temperature lag 2 + Rain lag 2 +Wind                                                   | 505.72 | 9.18 |

|                                                                                                                                         |        |      |
|-----------------------------------------------------------------------------------------------------------------------------------------|--------|------|
| HLC ~ 1 + Eggs/site/day + Rain lag 3 + Rain lag 3 <sup>2</sup>                                                                          | 505.73 | 9.45 |
| HLC ~ 1 + Eggs/site/day + Temperature lag 1 + Rain lag 3                                                                                | 505.73 | 9.52 |
| HLC ~ 1 + Eggs/site/day + Rain lag 2 + Rain lag 2 <sup>2</sup> + Wind                                                                   | 505.74 | 9.15 |
| HLC ~ 1 + Eggs/site/day + Site + Temperature + Rain Index + Wind                                                                        | 505.75 | 8.82 |
| HLC ~ 1 + Eggs/site/day + Temperature lag 1 + Rain lag 2                                                                                | 505.76 | 9.51 |
| HLC ~ 1 + Eggs/site/day + Temperature lag 2 + Rain lag 2                                                                                | 505.77 | 9.44 |
| HLC ~ 1 + Eggs/site/day + Site + Temperature lag 3 + Temperature lag 3 <sup>2</sup>                                                     | 505.77 | 8.77 |
| HLC ~ 1 + Eggs/site/day + Site + Temperature lag 1 + Temperature lag 1 <sup>2</sup> + Rain lag 1                                        | 505.79 | 8.55 |
| HLC ~ 1 + Eggs/site/day + Site + Temperature + Temperature <sup>2</sup> + Rain lag 2 + Rain lag 2 <sup>2</sup>                          | 505.82 | 8.08 |
| HLC ~ 1 + Eggs/site/day + Temperature lag 2 + Temperature lag 2 <sup>2</sup> + Rain lag 1 + Wind                                        | 505.85 | 8.92 |
| HLC ~ 1 + Eggs/site/day + Temperature lag 1 + Rain lag 1 + Rain lag 1 <sup>2</sup> + Wind                                               | 505.85 | 9.23 |
| HLC ~ 1 + Eggs/site/day + Temperature + Temperature <sup>2</sup> + Rain lag 2 + Rain lag 2 <sup>2</sup>                                 | 505.85 | 8.50 |
| HLC ~ 1 + Eggs/site/day + Site + Temperature lag 3 + Rain Index + Wind                                                                  | 505.92 | 8.74 |
| HLC ~ 1 + Eggs/site/day + Site + Temperature lag 1 + Temperature lag 1 <sup>2</sup> + Rain lag 1 + Rain lag 1 <sup>2</sup> + Wind       | 505.96 | 7.85 |
| HLC ~ 1 + Eggs/site/day + Site + Temperature lag 1 + Temperature lag 1 <sup>2</sup> + Rain lag 3                                        | 505.96 | 8.21 |
| HLC ~ 1 + Eggs/site/day + Temperature + Temperature <sup>2</sup> + Rain lag 3 + Rain lag 3 <sup>2</sup>                                 | 505.96 | 8.48 |
| HLC ~ 1 + Eggs/site/day + Eggs/site/day:Site+Site+ Temperature + Temperature <sup>2</sup> + Rain lag 3                                  | 506.00 | 8.12 |
| HLC ~ 1 + Eggs/site/day + Eggs/site/day:Site+Site+ Temperature lag 1 + Temperature lag 1 <sup>2</sup> + Rain lag 2 + Wind               | 506.01 | 7.50 |
| HLC ~ 1 + Eggs/site/day + Site + Temperature lag 2 + Rain Index + Wind                                                                  | 506.05 | 8.75 |
| HLC ~ 1 + Eggs/site/day + Eggs/site/day:Site+Site+ Temperature + Wind                                                                   | 506.05 | 8.85 |
| HLC ~ 1 + Eggs/site/day + Eggs/site/day:Site+Site+ Temperature lag 1 + Wind                                                             | 506.09 | 8.81 |
| HLC ~ 1 + Eggs/site/day + Temperature lag 2 + Temperature lag 2 <sup>2</sup> + Rain Index + Wind                                        | 506.11 | 8.66 |
| HLC ~ 1 + Eggs/site/day + Temperature lag 3 + Rain lag 1 + Rain lag 1 <sup>2</sup>                                                      | 506.13 | 9.47 |
| HLC ~ 1 + Eggs/site/day + Temperature lag 3 + Rain lag 1 + Rain lag 1 <sup>2</sup> + Wind                                               | 506.14 | 9.19 |
| HLC ~ 1 + Eggs/site/day + Temperature lag 2 + Temperature lag 2 <sup>2</sup> + Rain lag 1                                               | 506.15 | 9.27 |
| HLC ~ 1 + Eggs/site/day + Temperature lag 3 + Temperature lag 3 <sup>2</sup> + Rain lag 1 + Wind                                        | 506.15 | 9.07 |
| HLC ~ 1 + Eggs/site/day + Temperature lag 3 + Temperature lag 3 <sup>2</sup> + Rain Index + Wind                                        | 506.20 | 8.70 |
| HLC ~ 1 + Eggs/site/day + Eggs/site/day:Site+Site+ Temperature lag 3                                                                    | 506.21 | 9.02 |
| HLC ~ 1 + Eggs/site/day + Site + Temperature lag 3 + Temperature lag 3 <sup>2</sup> + Rain Index                                        | 506.23 | 8.59 |
| HLC ~ 1 + Eggs/site/day + Eggs/site/day:Site+Site+ Temperature lag 3 + Wind                                                             | 506.26 | 8.74 |
| HLC ~ 1 + Eggs/site/day + Eggs/site/day:Site+Site+ Temperature + Rain Index                                                             | 506.26 | 8.99 |
| HLC ~ 1 + Eggs/site/day + Temperature lag 1 + Rain lag 1 + Rain lag 1 <sup>2</sup>                                                      | 506.27 | 9.50 |
| HLC ~ 1 + Eggs/site/day + Eggs/site/day:Site+Site+ Temperature + Temperature <sup>2</sup> + Rain lag 3 + Rain lag 3 <sup>2</sup> + Wind | 506.29 | 7.19 |
| HLC ~ 1 + Eggs/site/day + Site + Temperature lag 1 + Temperature lag 1 <sup>2</sup> + Rain lag 2 + Rain lag 2 <sup>2</sup> + Wind       | 506.29 | 7.49 |
| HLC ~ 1 + Eggs/site/day + Temperature lag 2 + Rain lag 1 + Rain lag 1 <sup>2</sup> + Wind                                               | 506.32 | 9.21 |
| HLC ~ 1 + Eggs/site/day + Site + Temperature lag 2 + Temperature lag 2 <sup>2</sup> + Rain Index                                        | 506.32 | 8.60 |
| HLC ~ 1 + Eggs/site/day + Eggs/site/day:Site+Site+ Temperature lag 2                                                                    | 506.33 | 9.03 |
| HLC ~ 1 + Eggs/site/day + Temperature lag 3 + Temperature lag 3 <sup>2</sup> + Rain lag 1                                               | 506.33 | 9.45 |
| HLC ~ 1 + Eggs/site/day + Eggs/site/day:Site+Site+ Temperature lag 1 + Temperature lag 1 <sup>2</sup> + Rain lag 3 + Wind               | 506.35 | 7.61 |
| HLC ~ 1 + Eggs/site/day + Eggs/site/day:Site+Site+ Temperature + Temperature <sup>2</sup> + Rain lag 1                                  | 506.37 | 9.07 |

|                                                                                                                  |        |       |
|------------------------------------------------------------------------------------------------------------------|--------|-------|
| HLC ~ 1 + Temperature                                                                                            | 506.37 | 10.35 |
| HLC ~ 1 + Eggs/site/day + Temperature lag 2 + Rain lag 1 + Rain lag 1^2                                          | 506.38 | 9.46  |
| HLC ~ 1 + Eggs/site/day + Eggs/site/day:Site+Site+ Temperature lag 2 +Wind                                       | 506.40 | 8.76  |
| HLC ~ 1 + Eggs/site/day + Eggs/site/day:Site+Site+ Temperature lag 1                                             | 506.40 | 9.08  |
| HLC ~ 1 + Eggs/site/day + Temperature lag 2+ Temperature lag 2^2 + Rain lag 2 +Wind                              | 506.41 | 8.60  |
| HLC ~ 1 + Eggs/site/day + Eggs/site/day:Site+Site+ Rain lag 3+Wind                                               | 506.44 | 8.86  |
| HLC ~ 1 + Eggs/site/day + Temperature lag 1+ Temperature lag 1^2 + Rain lag 2 + Rain lag 2^2 +Wind               | 506.46 | 7.95  |
| HLC ~ 1 + Eggs/site/day + Eggs/site/day:Site+Site+ Rain lag 2 +Wind                                              | 506.46 | 8.82  |
| HLC ~ 1 + Eggs/site/day +Site+ Temperature + Rain lag 3+Wind                                                     | 506.46 | 8.99  |
| HLC ~ 1 + Eggs/site/day + Temperature + Rain lag 3 + Rain lag 3^2                                                | 506.46 | 9.57  |
| HLC ~ 1 + Eggs/site/day +Site+ Temperature + Rain lag 2 +Wind                                                    | 506.46 | 9.00  |
| HLC ~ 1 + Eggs/site/day +Site+ Rain lag 3 + Rain lag 3^2+Wind                                                    | 506.47 | 8.76  |
| HLC ~ 1 + Eggs/site/day + Eggs/site/day:Site+Site+ Rain lag 3                                                    | 506.49 | 9.17  |
| HLC ~ 1 + Eggs/site/day +Site+ Temperature lag 1 + Rain lag 2 +Wind                                              | 506.49 | 8.92  |
| HLC ~ 1 + Eggs/site/day + Temperature lag 1+ Temperature lag 1^2 + Rain lag 1 + Rain lag 1^2                     | 506.49 | 8.64  |
| HLC ~ 1 + Eggs/site/day +Site+ Temperature lag 1 + Rain lag 3+Wind                                               | 506.49 | 8.89  |
| HLC ~ 1 + Eggs/site/day +Site+ Temperature + Temperature^2 + Rain lag 3 + Rain lag 3^2                           | 506.50 | 8.11  |
| HLC ~ 1 + Eggs/site/day + Temperature lag 2+ Temperature lag 2^2 + Rain lag 3+Wind                               | 506.53 | 8.70  |
| HLC ~ 1 + Eggs/site/day + Eggs/site/day:Site+Site+ Rain lag 2                                                    | 506.55 | 9.12  |
| HLC ~ 1 + Eggs/site/day + Temperature + Rain lag 2 + Rain lag 2^2                                                | 506.55 | 9.57  |
| HLC ~ 1 + Temperature + Temperature^2                                                                            | 506.58 | 9.77  |
| HLC ~ 1 + Eggs/site/day + Eggs/site/day:Site+Site+ Temperature + Temperature^2 + Rain lag 1 + Rain lag 1^2 +Wind | 506.59 | 7.64  |
| HLC ~ 1 + Eggs/site/day + Temperature lag 3+ Temperature lag 3^2 + Rain lag 2 +Wind                              | 506.66 | 8.65  |
| HLC ~ 1 + Eggs/site/day +Site+ Temperature lag 3 + Rain lag 2 +Wind                                              | 506.68 | 8.85  |
| HLC ~ 1 + Eggs/site/day +Site+ Temperature lag 3 + Rain lag 3+Wind                                               | 506.68 | 8.91  |
| HLC ~ 1 + Eggs/site/day + Temperature lag 3+ Temperature lag 3^2 + Rain lag 3+Wind                               | 506.70 | 8.69  |
| HLC ~ 1 + Eggs/site/day + Eggs/site/day:Site+Site+ Temperature + Temperature^2 + Rain lag 2                      | 506.70 | 8.43  |
| HLC ~ 1 + Eggs/site/day +Site+ Temperature lag 3 + Rain lag 3                                                    | 506.73 | 9.23  |
| HLC ~ 1 + Eggs/site/day + Eggs/site/day:Site+Site+ Temperature + Temperature^2 + Rain lag 1 +Wind                | 506.74 | 8.44  |
| HLC ~ 1 + Eggs/site/day +Site+ Temperature lag 3 + Rain lag 2                                                    | 506.77 | 9.16  |
| HLC ~ 1 + Eggs/site/day + Eggs/site/day:Site+Site+ Temperature lag 1 + Rain Index                                | 506.80 | 8.97  |
| HLC ~ 1 + Eggs/site/day +Site+ Temperature lag 2 + Rain lag 2 +Wind                                              | 506.81 | 8.86  |
| HLC ~ 1 + Eggs/site/day +Site+ Temperature lag 2 + Rain lag 3+Wind                                               | 506.82 | 8.91  |
| HLC ~ 1 + Eggs/site/day +Site+ Rain lag 2 + Rain lag 2^2                                                         | 506.83 | 9.07  |
| HLC ~ 1 + Eggs/site/day + Eggs/site/day:Site+Site+ Temperature lag 2+ Temperature lag 2^2 +Wind                  | 506.83 | 8.26  |
| HLC ~ 1 + Eggs/site/day +Site+ Temperature lag 2+ Temperature lag 2^2 + Rain lag 1 +Wind                         | 506.84 | 8.60  |
| HLC ~ 1 + Eggs/site/day +Site+ Rain lag 2 + Rain lag 2^2 +Wind                                                   | 506.84 | 8.82  |
| HLC ~ 1 + Eggs/site/day +Site+ Temperature + Rain lag 1 + Rain lag 1^2 +Wind                                     | 506.85 | 9.09  |
| HLC ~ 1 + Eggs/site/day +Site+ Temperature lag 2 + Rain lag 3                                                    | 506.85 | 9.22  |

|                                                                                                              |        |       |
|--------------------------------------------------------------------------------------------------------------|--------|-------|
| HLC ~ 1 + Eggs/site/day + Eggs/site/day:Site+Site+ Temperature lag 1+ Temperature lag 1^2 + Rain Index       | 506.86 | 8.18  |
| HLC ~ 1 + Eggs/site/day +Site+ Rain lag 3 + Rain lag 3^2                                                     | 506.88 | 9.14  |
| HLC ~ 1 + Eggs/site/day +Site+ Temperature lag 2 + Rain lag 2                                                | 506.89 | 9.14  |
| HLC ~ 1 + Eggs/site/day + Temperature lag 2+ Temperature lag 2^2 + Rain lag 2                                | 506.91 | 9.00  |
| HLC ~ 1 + Eggs/site/day + Eggs/site/day:Site+Site+ Temperature lag 3 + Rain Index                            | 506.92 | 8.90  |
| HLC ~ 1 + Eggs/site/day +Site+ Temperature lag 1 + Rain lag 3                                                | 506.93 | 9.22  |
| HLC ~ 1 + Eggs/site/day +Site+ Temperature lag 1 + Rain lag 2                                                | 506.95 | 9.20  |
| HLC ~ 1 + Eggs/site/day +Site+ Temperature lag 2+ Temperature lag 2^2 + Rain Index +Wind                     | 506.95 | 8.31  |
| HLC ~ 1 + Eggs/site/day + Temperature lag 2+ Temperature lag 2^2 + Rain lag 3                                | 506.99 | 9.13  |
| HLC ~ 1 + Eggs/site/day + Eggs/site/day:Site+Site+ Temperature lag 1+ Temperature lag 1^2 + Rain Index +Wind | 506.99 | 7.83  |
| HLC ~ 1 + Eggs/site/day + Eggs/site/day:Site+Site+ Temperature lag 1+ Temperature lag 1^2 + Rain lag 1 +Wind | 507.01 | 8.08  |
| HLC ~ 1 + Eggs/site/day + Eggs/site/day:Site+Site+ Temperature + Rain lag 1 +Wind                            | 507.03 | 9.21  |
| HLC ~ 1 + Eggs/site/day +Site+ Temperature lag 3+ Temperature lag 3^2 + Rain Index +Wind                     | 507.03 | 8.34  |
| HLC ~ 1 + Eggs/site/day + Eggs/site/day:Site+Site+ Temperature lag 2 + Rain Index                            | 507.06 | 8.91  |
| HLC ~ 1 + Eggs/site/day +Site+ Temperature lag 1 + Rain lag 1 + Rain lag 1^2 +Wind                           | 507.07 | 8.90  |
| HLC ~ 1 + Eggs/site/day +Site+ Temperature lag 2+ Temperature lag 2^2 + Rain lag 2 +Wind                     | 507.08 | 8.26  |
| HLC ~ 1 + Eggs/site/day +Site+ Temperature lag 1+ Temperature lag 1^2 + Rain lag 1 + Rain lag 1^2            | 507.16 | 8.27  |
| HLC ~ 1 + Eggs/site/day + Temperature lag 3+ Temperature lag 3^2 + Rain lag 2                                | 507.19 | 9.09  |
| HLC ~ 1 + Eggs/site/day +Site+ Temperature lag 3+ Temperature lag 3^2 + Rain lag 1 +Wind                     | 507.20 | 8.76  |
| HLC ~ 1 + Eggs/site/day + Eggs/site/day:Site+Site+ Temperature lag 2+ Temperature lag 2^2                    | 507.23 | 8.63  |
| HLC ~ 1 + Eggs/site/day +Site+ Temperature lag 2+ Temperature lag 2^2 + Rain lag 1                           | 507.25 | 8.97  |
| HLC ~ 1 + Eggs/site/day + Eggs/site/day:Site+Site+ Temperature lag 3+ Temperature lag 3^2 +Wind              | 507.25 | 8.33  |
| HLC ~ 1 + Eggs/site/day +Site+ Temperature lag 3+ Temperature lag 3^2 + Rain lag 2 +Wind                     | 507.26 | 8.32  |
| HLC ~ 1 + Eggs/site/day + Temperature lag 3+ Temperature lag 3^2 + Rain lag 3                                | 507.27 | 9.20  |
| HLC ~ 1 + Temperature + Rain lag 1                                                                           | 507.27 | 10.67 |
| HLC ~ 1 + Eggs/site/day + Eggs/site/day:Site+Site+ Rain lag 1 + Rain lag 1^2 +Wind                           | 507.27 | 8.82  |
| HLC ~ 1 + Eggs/site/day +Site+ Temperature lag 3 + Rain lag 1 + Rain lag 1^2 +Wind                           | 507.31 | 8.86  |
| HLC ~ 1 + Eggs/site/day +Site+ Temperature lag 2+ Temperature lag 2^2 + Rain lag 3+Wind                      | 507.31 | 8.37  |
| HLC ~ 1 + Eggs/site/day +Site+ Temperature lag 3 + Rain lag 1 + Rain lag 1^2                                 | 507.33 | 9.15  |
| HLC ~ 1 + Eggs/site/day + Eggs/site/day:Site+Site+ Rain lag 1 + Rain lag 1^2                                 | 507.33 | 9.11  |
| HLC ~ 1                                                                                                      | 507.35 | 10.44 |
| HLC ~ 1 + Eggs/site/day +Site+ Temperature lag 3+ Temperature lag 3^2 + Rain lag 3+Wind                      | 507.39 | 8.37  |
| HLC ~ 1 + Eggs/site/day + Temperature lag 2+ Temperature lag 2^2 + Rain lag 1 + Rain lag 1^2 +Wind           | 507.41 | 8.68  |
| HLC ~ 1 + Eggs/site/day + Temperature + Rain lag 3 + Rain lag 3^2+Wind                                       | 507.42 | 9.21  |
| HLC ~ 1 + Eggs/site/day + Eggs/site/day:Site+Site+ Temperature lag 3 + Rain lag 1                            | 507.43 | 9.21  |

|                                                                                                                            |        |       |
|----------------------------------------------------------------------------------------------------------------------------|--------|-------|
| HLC ~ 1 + Eggs/site/day + Temperature lag 1+ Temperature lag 1^2 + Rain lag 2 + Rain lag 2^2                               | 507.43 | 8.37  |
| HLC ~ 1 + Eggs/site/day + Temperature lag 1+ Temperature lag 1^2 + Rain lag 3 + Rain lag 3^2                               | 507.47 | 8.41  |
| HLC ~ 1 + Eggs/site/day +Site+ Temperature lag 3+ Temperature lag 3^2 + Rain lag 1                                         | 507.47 | 9.18  |
| HLC ~ 1 + Eggs/site/day + Eggs/site/day:Site+Site+ Temperature lag 1 + Rain lag 1 +Wind                                    | 507.47 | 9.02  |
| HLC ~ 1 + Eggs/site/day +Site+ Temperature lag 2 + Rain lag 1 + Rain lag 1^2 +Wind                                         | 507.49 | 8.87  |
| HLC ~ 1 + Eggs/site/day +Site+ Temperature lag 1 + Rain lag 1 + Rain lag 1^2                                               | 507.50 | 9.18  |
| HLC ~ 1 + Eggs/site/day + Eggs/site/day:Site+Site+ Temperature + Rain lag 3                                                | 507.55 | 9.31  |
| HLC ~ 1 + Eggs/site/day + Eggs/site/day:Site+Site+ Temperature + Rain lag 2                                                | 507.56 | 9.34  |
| HLC ~ 1 + Eggs/site/day +Site+ Temperature lag 2 + Rain lag 1 + Rain lag 1^2                                               | 507.57 | 9.14  |
| HLC ~ 1 + Eggs/site/day + Eggs/site/day:Site+Site+ Temperature lag 3 + Rain lag 1 +Wind                                    | 507.59 | 8.94  |
| HLC ~ 1 + Eggs/site/day + Eggs/site/day:Site+Site+ Temperature lag 3+ Temperature lag 3^2                                  | 507.60 | 8.69  |
| HLC ~ 1 + Eggs/site/day + Eggs/site/day:Site+Site+ Temperature lag 1+ Temperature lag 1^2 + Rain lag 3 + Rain lag 3^2+Wind | 507.63 | 7.34  |
| HLC ~ 1 + Eggs/site/day + Temperature lag 1 + Rain lag 3 + Rain lag 3^2+Wind                                               | 507.66 | 9.14  |
| HLC ~ 1 + Eggs/site/day + Eggs/site/day:Site+Site+ Temperature lag 1+ Temperature lag 1^2 + Rain lag 2                     | 507.66 | 8.05  |
| HLC ~ 1 + Temperature + Temperature^2 + Rain lag 3                                                                         | 507.67 | 9.16  |
| HLC ~ 1 + Eggs/site/day +Site+ Temperature lag 1+ Temperature lag 1^2 + Rain lag 2 + Rain lag 2^2                          | 507.70 | 7.97  |
| HLC ~ 1 + Eggs/site/day + Eggs/site/day:Site+Site+ Temperature lag 1 + Rain lag 1                                          | 507.71 | 9.28  |
| HLC ~ 1 + Eggs/site/day + Eggs/site/day:Site+Site+ Temperature lag 2 + Rain lag 1                                          | 507.72 | 9.21  |
| HLC ~ 1 + Eggs/site/day + Temperature lag 3 + Rain lag 3 + Rain lag 3^2+Wind                                               | 507.72 | 9.11  |
| HLC ~ 1 + Eggs/site/day + Eggs/site/day:Site+Site+ Temperature + Temperature^2 + Rain lag 1 + Rain lag 1^2                 | 507.77 | 8.64  |
| HLC ~ 1 + Eggs/site/day + Temperature + Rain lag 2 + Rain lag 2^2 +Wind                                                    | 507.78 | 9.29  |
| HLC ~ 1 +Wind                                                                                                              | 507.79 | 10.20 |
| HLC ~ 1 + Eggs/site/day +Site+ Temperature + Rain lag 3 + Rain lag 3^2                                                     | 507.80 | 9.28  |
| HLC ~ 1 + Eggs/site/day + Eggs/site/day:Site+Site+ Temperature lag 1 + Rain Index +Wind                                    | 507.81 | 8.79  |
| HLC ~ 1 + Eggs/site/day +Site+ Temperature lag 1+ Temperature lag 1^2 + Rain lag 3 + Rain lag 3^2                          | 507.81 | 8.03  |
| HLC ~ 1 + Eggs/site/day +Site+ Temperature lag 2+ Temperature lag 2^2 + Rain lag 2                                         | 507.82 | 8.70  |
| HLC ~ 1 + Eggs/site/day + Temperature lag 3+ Temperature lag 3^2 + Rain lag 1 + Rain lag 1^2 +Wind                         | 507.82 | 8.81  |
| HLC ~ 1 + Eggs/site/day + Temperature lag 2+ Temperature lag 2^2 + Rain lag 1 + Rain lag 1^2                               | 507.83 | 9.05  |
| HLC ~ 1 + Eggs/site/day + Temperature lag 1 + Rain lag 2 + Rain lag 2^2 +Wind                                              | 507.83 | 9.22  |
| HLC ~ 1 + Eggs/site/day + Eggs/site/day:Site+Site+ Temperature lag 2 + Rain lag 1 +Wind                                    | 507.84 | 8.96  |
| HLC ~ 1 + Eggs/site/day + Temperature lag 3 + Rain lag 3 + Rain lag 3^2                                                    | 507.84 | 9.45  |
| HLC ~ 1 + Eggs/site/day +Site+ Temperature + Rain lag 2 + Rain lag 2^2                                                     | 507.85 | 9.27  |
| HLC ~ 1 + Eggs/site/day + Temperature lag 2 + Rain lag 3 + Rain lag 3^2+Wind                                               | 507.88 | 9.12  |
| HLC ~ 1 + Eggs/site/day + Eggs/site/day:Site+Site+ Temperature lag 1+ Temperature lag 1^2 + Rain lag 1                     | 507.89 | 8.48  |
| HLC ~ 1 +Site+ Temperature                                                                                                 | 507.89 | 10.12 |
| HLC ~ 1 + Eggs/site/day + Temperature lag 3 + Rain lag 2 + Rain lag 2^2                                                    | 507.90 | 9.40  |
| HLC ~ 1 + Temperature + Temperature^2 +Wind                                                                                | 507.91 | 9.47  |



|                                                                                                                             |        |       |
|-----------------------------------------------------------------------------------------------------------------------------|--------|-------|
| HLC ~ 1 + Eggs/site/day + Eggs/site/day:Site+Site+ Temperature + Rain lag 1 + Rain lag 1^2                                  | 507.94 | 9.41  |
| HLC ~ 1 + Eggs/site/day + Temperature lag 1 + Rain lag 2 + Rain lag 2^2                                                     | 507.95 | 9.44  |
| HLC ~ 1 + Eggs/site/day +Site+ Temperature lag 2+ Temperature lag 2^2 + Rain lag 3                                          | 507.98 | 8.84  |
| HLC ~ 1 + Eggs/site/day + Temperature lag 2 + Rain lag 3 + Rain lag 3^2                                                     | 507.98 | 9.46  |
| HLC ~ 1 + Eggs/site/day + Eggs/site/day:Site+Site+ Temperature + Rain Index +Wind                                           | 507.99 | 8.81  |
| HLC ~ 1 +Site+ Temperature + Temperature^2                                                                                  | 508.00 | 9.54  |
| HLC ~ 1 + Eggs/site/day + Temperature lag 2 + Rain lag 2 + Rain lag 2^2                                                     | 508.01 | 9.39  |
| HLC ~ 1 + Eggs/site/day + Eggs/site/day:Site+Site+ Temperature lag 1+ Temperature lag 1^2 + Rain lag 3                      | 508.02 | 8.19  |
| HLC ~ 1 + Eggs/site/day +Site+ Temperature lag 3+ Temperature lag 3^2 + Rain lag 2                                          | 508.03 | 8.81  |
| HLC ~ 1 + Temperature + Temperature^2 + Rain lag 3+Wind                                                                     | 508.08 | 8.58  |
| HLC ~ 1 + Eggs/site/day + Temperature lag 1 + Rain lag 3 + Rain lag 3^2                                                     | 508.10 | 9.48  |
| HLC ~ 1 + Temperature + Temperature^2 + Rain lag 1                                                                          | 508.11 | 10.19 |
| HLC ~ 1 + Eggs/site/day + Temperature lag 3 + Rain lag 2 + Rain lag 2^2 +Wind                                               | 508.12 | 9.16  |
| HLC ~ 1 + Eggs/site/day + Temperature lag 3+ Temperature lag 3^2 + Rain lag 1 + Rain lag 1^2                                | 508.12 | 9.21  |
| HLC ~ 1 + Eggs/site/day + Eggs/site/day:Site+Site+ Temperature lag 3 + Rain Index +Wind                                     | 508.14 | 8.71  |
| HLC ~ 1 + Temperature +Wind                                                                                                 | 508.16 | 10.21 |
| HLC ~ 1 + Eggs/site/day + Eggs/site/day:Site+Site+ Temperature + Temperature^2 + Rain lag 2 + Rain lag 2^2                  | 508.18 | 8.11  |
| HLC ~ 1 + Eggs/site/day +Site+ Temperature lag 3+ Temperature lag 3^2 + Rain lag 3                                          | 508.19 | 8.95  |
| HLC ~ 1 + Eggs/site/day + Temperature lag 2 + Rain lag 2 + Rain lag 2^2 +Wind                                               | 508.24 | 9.17  |
| HLC ~ 1 + Eggs/site/day + Eggs/site/day:Site+Site+ Temperature lag 3+ Temperature lag 3^2 + Rain Index                      | 508.26 | 8.53  |
| HLC ~ 1 + Eggs/site/day +Site+ Temperature lag 2+ Temperature lag 2^2 + Rain lag 1 + Rain lag 1^2 +Wind                     | 508.28 | 8.33  |
| HLC ~ 1 + Eggs/site/day + Eggs/site/day:Site+Site+ Temperature lag 2 + Rain Index +Wind                                     | 508.28 | 8.73  |
| HLC ~ 1 + Temperature + Temperature^2 + Rain Index                                                                          | 508.31 | 9.64  |
| HLC ~ 1 + Eggs/site/day + Eggs/site/day:Site+Site+ Temperature lag 2+ Temperature lag 2^2 + Rain Index                      | 508.33 | 8.54  |
| HLC ~ 1 + Temperature + Rain Index                                                                                          | 508.37 | 10.31 |
| HLC ~ 1 + Temperature lag 1 +Wind                                                                                           | 508.37 | 10.12 |
| HLC ~ 1 + Eggs/site/day + Eggs/site/day:Site+Site+ Temperature lag 1+ Temperature lag 1^2 + Rain lag 1 + Rain lag 1^2 +Wind | 508.46 | 7.82  |
| HLC ~ 1 + Temperature lag 1                                                                                                 | 508.46 | 10.37 |
| HLC ~ 1 + Eggs/site/day + Eggs/site/day:Site+Site+ Temperature + Temperature^2 + Rain lag 3 + Rain lag 3^2                  | 508.57 | 8.08  |
| HLC ~ 1 + Eggs/site/day + Temperature lag 2+ Temperature lag 2^2 + Rain lag 2 + Rain lag 2^2                                | 508.65 | 8.78  |
| HLC ~ 1 + Eggs/site/day +Site+ Temperature + Rain lag 3 + Rain lag 3^2+Wind                                                 | 508.65 | 8.90  |
| HLC ~ 1 + Eggs/site/day + Eggs/site/day:Site+Site+ Temperature + Rain lag 3+Wind                                            | 508.65 | 8.99  |
| HLC ~ 1 + Temperature + Rain lag 2                                                                                          | 508.66 | 10.49 |
| HLC ~ 1 + Eggs/site/day + Eggs/site/day:Site+Site+ Temperature + Rain lag 2 +Wind                                           | 508.66 | 9.00  |
| HLC ~ 1 + Eggs/site/day + Temperature lag 2+ Temperature lag 2^2 + Rain lag 2 + Rain lag 2^2 +Wind                          | 508.68 | 8.48  |
| HLC ~ 1 + Temperature + Rain lag 3                                                                                          | 508.68 | 10.41 |
| HLC ~ 1 + Eggs/site/day + Eggs/site/day:Site+Site+ Temperature lag 3 + Rain lag 3                                           | 508.68 | 9.19  |

|                                                                                                                             |        |       |
|-----------------------------------------------------------------------------------------------------------------------------|--------|-------|
| HLC ~ 1 + Eggs/site/day + Eggs/site/day:Site+Site+ Temperature lag 1 + Rain lag 2 +Wind                                     | 508.69 | 8.91  |
| HLC ~ 1 + Eggs/site/day + Eggs/site/day:Site+Site+ Temperature lag 1 + Rain lag 3+Wind                                      | 508.69 | 8.88  |
| HLC ~ 1 + Eggs/site/day + Eggs/site/day:Site+Site+ Rain lag 3 + Rain lag 3^2+Wind                                           | 508.72 | 8.76  |
| HLC ~ 1 + Eggs/site/day + Eggs/site/day:Site+Site+ Temperature lag 3 + Rain lag 2                                           | 508.74 | 9.12  |
| HLC ~ 1 + Eggs/site/day +Site+ Temperature lag 3+ Temperature lag 3^2 + Rain lag 1 + Rain lag 1^2 +Wind                     | 508.75 | 8.48  |
| HLC ~ 1 + Eggs/site/day + Eggs/site/day:Site+Site+ Temperature lag 1+ Temperature lag 1^2 + Rain lag 2 + Rain lag 2^2 +Wind | 508.76 | 7.50  |
| HLC ~ 1 + Temperature + Temperature^2 + Rain lag 2                                                                          | 508.78 | 9.66  |
| HLC ~ 1 + Eggs/site/day + Eggs/site/day:Site+Site+ Temperature lag 2 + Rain lag 3                                           | 508.79 | 9.19  |
| HLC ~ 1 +Site                                                                                                               | 508.81 | 10.22 |
| HLC ~ 1 + Rain Index                                                                                                        | 508.81 | 10.40 |
| HLC ~ 1 + Eggs/site/day +Site+ Temperature lag 3 + Rain lag 3 + Rain lag 3^2+Wind                                           | 508.83 | 8.79  |
| HLC ~ 1 +Site+ Temperature + Temperature^2 + Rain lag 3                                                                     | 508.83 | 8.94  |
| HLC ~ 1 + Eggs/site/day +Site+ Temperature lag 2+ Temperature lag 2^2 + Rain lag 1 + Rain lag 1^2                           | 508.85 | 8.73  |
| HLC ~ 1 + Eggs/site/day + Eggs/site/day:Site+Site+ Temperature lag 3 + Rain lag 3+Wind                                      | 508.85 | 8.88  |
| HLC ~ 1 + Eggs/site/day +Site+ Temperature lag 1 + Rain lag 3 + Rain lag 3^2+Wind                                           | 508.85 | 8.82  |
| HLC ~ 1 + Eggs/site/day + Eggs/site/day:Site+Site+ Temperature lag 2 + Rain lag 2                                           | 508.86 | 9.11  |
| HLC ~ 1 + Eggs/site/day + Eggs/site/day:Site+Site+ Temperature lag 3 + Rain lag 2 +Wind                                     | 508.86 | 8.83  |
| HLC ~ 1 +Site+ Temperature + Temperature^2 + Rain lag 3+Wind                                                                | 508.87 | 8.31  |
| HLC ~ 1 + Eggs/site/day + Eggs/site/day:Site+Site+ Rain lag 3 + Rain lag 3^2                                                | 508.89 | 9.12  |
| HLC ~ 1 + Eggs/site/day + Eggs/site/day:Site+Site+ Rain lag 2 + Rain lag 2^2                                                | 508.89 | 9.07  |
| HLC ~ 1 + Eggs/site/day + Eggs/site/day:Site+Site+ Temperature lag 1 + Rain lag 3                                           | 508.90 | 9.20  |
| HLC ~ 1 +Site+ Temperature + Rain lag 1                                                                                     | 508.91 | 10.46 |
| HLC ~ 1 + Eggs/site/day + Eggs/site/day:Site+Site+ Temperature lag 1 + Rain lag 2                                           | 508.93 | 9.19  |
| HLC ~ 1 + Eggs/site/day + Temperature lag 2+ Temperature lag 2^2 + Rain lag 3 + Rain lag 3^2+Wind                           | 508.93 | 8.65  |
| HLC ~ 1 + Eggs/site/day + Eggs/site/day:Site+Site+ Temperature lag 2 + Rain lag 3+Wind                                      | 508.99 | 8.89  |
| HLC ~ 1 + Eggs/site/day + Eggs/site/day:Site+Site+ Temperature lag 2 + Rain lag 2 +Wind                                     | 509.00 | 8.84  |
| HLC ~ 1 + Eggs/site/day +Site+ Temperature lag 2 + Rain lag 3 + Rain lag 3^2+Wind                                           | 509.01 | 8.80  |
| HLC ~ 1 + Eggs/site/day + Temperature lag 3+ Temperature lag 3^2 + Rain lag 3 + Rain lag 3^2+Wind                           | 509.02 | 8.63  |
| HLC ~ 1 + Eggs/site/day +Site+ Temperature + Rain lag 2 + Rain lag 2^2 +Wind                                                | 509.03 | 8.98  |
| HLC ~ 1 + Eggs/site/day +Site+ Temperature lag 3 + Rain lag 3 + Rain lag 3^2                                                | 509.03 | 9.16  |
| HLC ~ 1 + Eggs/site/day + Eggs/site/day:Site+Site+ Temperature lag 2+ Temperature lag 2^2 + Rain lag 1 +Wind                | 509.04 | 8.52  |
| HLC ~ 1 + Eggs/site/day +Site+ Temperature lag 1 + Rain lag 2 + Rain lag 2^2 +Wind                                          | 509.05 | 8.90  |
| HLC ~ 1 + Rain lag 1                                                                                                        | 509.06 | 10.58 |
| HLC ~ 1 + Eggs/site/day +Site+ Temperature lag 3 + Rain lag 2 + Rain lag 2^2                                                | 509.06 | 9.09  |
| HLC ~ 1 + Eggs/site/day + Eggs/site/day:Site+Site+ Rain lag 2 + Rain lag 2^2 +Wind                                          | 509.06 | 8.82  |
| HLC ~ 1 + Eggs/site/day + Eggs/site/day:Site+Site+ Temperature lag 2+ Temperature lag 2^2 + Rain Index +Wind                | 509.09 | 8.26  |
| HLC ~ 1 + Eggs/site/day + Temperature lag 3+ Temperature lag 3^2 + Rain lag 2 + Rain lag 2^2 +Wind                          | 509.15 | 8.60  |
| HLC ~ 1 + Eggs/site/day +Site+ Temperature lag 1 + Rain lag 2 + Rain lag 2^2                                                | 509.15 | 9.12  |
| HLC ~ 1 + Eggs/site/day +Site+ Temperature lag 2 + Rain lag 2 + Rain lag 2^2                                                | 509.17 | 9.07  |

|                                                                                                                       |        |       |
|-----------------------------------------------------------------------------------------------------------------------|--------|-------|
| HLC ~ 1 + Eggs/site/day +Site+ Temperature lag 3+ Temperature lag 3^2 + Rain lag 1 + Rain lag 1^2                     | 509.18 | 8.92  |
| HLC ~ 1 + Eggs/site/day +Site+ Temperature lag 2 + Rain lag 3 + Rain lag 3^2                                          | 509.18 | 9.16  |
| HLC ~ 1 + Eggs/site/day + Eggs/site/day:Site+Site+ Temperature lag 2+ Temperature lag 2^2 + Rain lag 2 +Wind          | 509.18 | 8.21  |
| HLC ~ 1 + Eggs/site/day + Eggs/site/day:Site+Site+ Temperature lag 3+ Temperature lag 3^2 + Rain Index +Wind          | 509.21 | 8.29  |
| HLC ~ 1 + Eggs/site/day +Site+ Temperature lag 2+ Temperature lag 2^2 + Rain lag 2 + Rain lag 2^2 +Wind               | 509.22 | 8.11  |
| HLC ~ 1 + Temperature lag 1+ Temperature lag 1^2 +Wind                                                                | 509.22 | 9.42  |
| HLC ~ 1 + Eggs/site/day + Eggs/site/day:Site+Site+ Temperature lag 2+ Temperature lag 2^2 + Rain lag 1                | 509.25 | 8.87  |
| HLC ~ 1 + Eggs/site/day + Temperature lag 3+ Temperature lag 3^2 + Rain lag 2 + Rain lag 2^2                          | 509.26 | 8.94  |
| HLC ~ 1 + Eggs/site/day +Site+ Temperature lag 3 + Rain lag 2 + Rain lag 2^2 +Wind                                    | 509.27 | 8.85  |
| HLC ~ 1 +Site+Wind                                                                                                    | 509.27 | 9.98  |
| HLC ~ 1 +Site+ Temperature + Temperature^2 +Wind                                                                      | 509.28 | 9.24  |
| HLC ~ 1 + Eggs/site/day + Eggs/site/day:Site+Site+ Temperature + Rain lag 1 + Rain lag 1^2 +Wind                      | 509.32 | 9.07  |
| HLC ~ 1 + Temperature + Rain lag 1 +Wind                                                                              | 509.32 | 10.52 |
| HLC ~ 1 + Eggs/site/day +Site+ Temperature lag 1 + Rain lag 3 + Rain lag 3^2                                          | 509.34 | 9.18  |
| HLC ~ 1 + Eggs/site/day +Site+ Temperature lag 2+ Temperature lag 2^2 + Rain lag 2 + Rain lag 2^2                     | 509.39 | 8.45  |
| HLC ~ 1 + Eggs/site/day +Site+ Temperature lag 2 + Rain lag 2 + Rain lag 2^2 +Wind                                    | 509.40 | 8.85  |
| HLC ~ 1 + Eggs/site/day + Eggs/site/day:Site+Site+ Temperature lag 2+ Temperature lag 2^2 + Rain lag 3+Wind           | 509.41 | 8.32  |
| HLC ~ 1 + Eggs/site/day + Eggs/site/day:Site+Site+ Temperature lag 3+ Temperature lag 3^2 + Rain lag 2 +Wind          | 509.41 | 8.26  |
| HLC ~ 1 + Eggs/site/day + Temperature lag 2+ Temperature lag 2^2 + Rain lag 3 + Rain lag 3^2                          | 509.44 | 9.11  |
| HLC ~ 1 + Eggs/site/day + Eggs/site/day:Site+Site+ Temperature lag 3+ Temperature lag 3^2 + Rain lag 1 +Wind          | 509.45 | 8.68  |
| HLC ~ 1 + Eggs/site/day + Eggs/site/day:Site+Site+ Temperature lag 1+ Temperature lag 1^2 + Rain lag 1 + Rain lag 1^2 | 509.46 | 8.23  |
| HLC ~ 1 + Eggs/site/day + Eggs/site/day:Site+Site+ Temperature lag 3+ Temperature lag 3^2 + Rain lag 3+Wind           | 509.52 | 8.31  |
| HLC ~ 1 + Temperature lag 1 + Rain Index                                                                              | 509.53 | 10.33 |
| HLC ~ 1 + Temperature lag 2                                                                                           | 509.54 | 10.44 |
| HLC ~ 1 + Eggs/site/day + Eggs/site/day:Site+Site+ Temperature lag 3+ Temperature lag 3^2 + Rain lag 1                | 509.54 | 9.07  |
| HLC ~ 1 + Eggs/site/day + Eggs/site/day:Site+Site+ Temperature lag 1 + Rain lag 1 + Rain lag 1^2 +Wind                | 509.54 | 8.88  |
| HLC ~ 1 + Eggs/site/day + Eggs/site/day:Site+Site+ Temperature lag 3 + Rain lag 1 + Rain lag 1^2                      | 509.58 | 9.11  |
| HLC ~ 1 + Rain lag 3                                                                                                  | 509.59 | 10.49 |
| HLC ~ 1 + Temperature lag 3                                                                                           | 509.59 | 10.45 |
| HLC ~ 1 + Rain lag 2                                                                                                  | 509.59 | 10.46 |
| HLC ~ 1 + Rain lag 1 +Wind                                                                                            | 509.59 | 10.34 |
| HLC ~ 1 + Temperature + Rain lag 1 + Rain lag 1^2                                                                     | 509.65 | 10.68 |
| HLC ~ 1 + Temperature lag 1+ Temperature lag 1^2                                                                      | 509.66 | 9.80  |

|                                                                                                                       |        |       |
|-----------------------------------------------------------------------------------------------------------------------|--------|-------|
| HLC ~ 1 + Eggs/site/day + Temperature lag 3+ Temperature lag 3^2 + Rain lag 3 + Rain lag 3^2                          | 509.67 | 9.16  |
| HLC ~ 1 + Eggs/site/day + Eggs/site/day:Site+Site+ Temperature lag 2+ Temperature lag 2^2 + Rain lag 2                | 509.69 | 8.63  |
| HLC ~ 1 +Site+ Temperature + Temperature^2 + Rain lag 1                                                               | 509.71 | 10.00 |
| HLC ~ 1 +Site+ Temperature +Wind                                                                                      | 509.71 | 9.98  |
| HLC ~ 1 + Eggs/site/day +Site+ Temperature lag 3+ Temperature lag 3^2 + Rain lag 2 + Rain lag 2^2 +Wind               | 509.72 | 8.25  |
| HLC ~ 1 + Eggs/site/day +Site+ Temperature lag 2+ Temperature lag 2^2 + Rain lag 3 + Rain lag 3^2+Wind                | 509.73 | 8.31  |
| HLC ~ 1 +Site+ Temperature + Temperature^2 + Rain Index                                                               | 509.74 | 9.40  |
| HLC ~ 1 + Eggs/site/day +Site+ Temperature lag 3+ Temperature lag 3^2 + Rain lag 3 + Rain lag 3^2+Wind                | 509.74 | 8.30  |
| HLC ~ 1 + Eggs/site/day + Eggs/site/day:Site+Site+ Temperature lag 3 + Rain lag 1 + Rain lag 1^2 +Wind                | 509.75 | 8.83  |
| HLC ~ 1 + Eggs/site/day + Eggs/site/day:Site+Site+ Temperature lag 1 + Rain lag 1 + Rain lag 1^2                      | 509.78 | 9.15  |
| HLC ~ 1 + Temperature + Temperature^2 + Rain lag 2 +Wind                                                              | 509.80 | 9.13  |
| HLC ~ 1 + Eggs/site/day + Eggs/site/day:Site+Site+ Temperature lag 2 + Rain lag 1 + Rain lag 1^2                      | 509.83 | 9.10  |
| HLC ~ 1 + Eggs/site/day + Eggs/site/day:Site+Site+ Temperature lag 2+ Temperature lag 2^2 + Rain lag 3                | 509.84 | 8.77  |
| HLC ~ 1 + Temperature + Temperature^2 + Rain lag 1 +Wind                                                              | 509.85 | 9.87  |
| HLC ~ 1 + Temperature lag 2 +Wind                                                                                     | 509.87 | 10.19 |
| HLC ~ 1 +Site+ Temperature lag 1 +Wind                                                                                | 509.90 | 9.88  |
| HLC ~ 1 + Rain Index +Wind                                                                                            | 509.92 | 10.21 |
| HLC ~ 1 +Site+ Temperature + Rain Index                                                                               | 509.93 | 10.08 |
| HLC ~ 1 + Eggs/site/day + Eggs/site/day:Site+Site+ Temperature + Rain lag 3 + Rain lag 3^2                            | 509.94 | 9.26  |
| HLC ~ 1 + Eggs/site/day + Eggs/site/day:Site+Site+ Temperature lag 2 + Rain lag 1 + Rain lag 1^2 +Wind                | 509.95 | 8.84  |
| HLC ~ 1 + Eggs/site/day + Eggs/site/day:Site+Site+ Temperature lag 3+ Temperature lag 3^2 + Rain lag 2                | 509.96 | 8.73  |
| HLC ~ 1 +Site+ Temperature lag 1                                                                                      | 509.97 | 10.14 |
| HLC ~ 1 + Eggs/site/day + Eggs/site/day:Site+Site+ Temperature lag 1+ Temperature lag 1^2 + Rain lag 2 + Rain lag 2^2 | 509.99 | 7.97  |
| HLC ~ 1 + Eggs/site/day + Eggs/site/day:Site+Site+ Temperature lag 1+ Temperature lag 1^2 + Rain lag 3 + Rain lag 3^2 | 510.00 | 8.02  |
| HLC ~ 1 + Eggs/site/day +Site+ Temperature lag 3+ Temperature lag 3^2 + Rain lag 2 + Rain lag 2^2                     | 510.00 | 8.63  |
| HLC ~ 1 + Eggs/site/day + Eggs/site/day:Site+Site+ Temperature + Rain lag 2 + Rain lag 2^2                            | 510.01 | 9.27  |
| HLC ~ 1 + Temperature lag 3 +Wind                                                                                     | 510.05 | 10.21 |
| HLC ~ 1 + Temperature + Temperature^2 + Rain Index +Wind                                                              | 510.07 | 9.42  |
| HLC ~ 1 + Temperature + Temperature^2 + Rain lag 3 + Rain lag 3^2                                                     | 510.09 | 9.19  |
| HLC ~ 1 + Rain lag 2 +Wind                                                                                            | 510.10 | 10.21 |
| HLC ~ 1 + Eggs/site/day + Eggs/site/day:Site+Site+ Temperature lag 3+ Temperature lag 3^2 + Rain lag 3                | 510.10 | 8.86  |
| HLC ~ 1 + Rain lag 3+Wind                                                                                             | 510.10 | 10.23 |
| HLC ~ 1 +Site+ Temperature + Temperature^2 + Rain lag 2                                                               | 510.13 | 9.50  |

|                                                                                                                             |        |       |
|-----------------------------------------------------------------------------------------------------------------------------|--------|-------|
| HLC ~ 1 + Temperature lag 1 + Rain lag 1 +Wind                                                                              | 510.17 | 10.29 |
| HLC ~ 1 + Temperature lag 1 + Rain lag 1                                                                                    | 510.17 | 10.54 |
| HLC ~ 1 +Site+ Temperature + Rain lag 2                                                                                     | 510.26 | 10.31 |
| HLC ~ 1 +Site+ Temperature + Rain lag 3                                                                                     | 510.26 | 10.21 |
| HLC ~ 1 + Temperature + Rain lag 3 + Rain lag 3^2                                                                           | 510.27 | 10.27 |
| HLC ~ 1 +Site+ Rain Index                                                                                                   | 510.31 | 10.18 |
| HLC ~ 1 + Temperature lag 1 + Rain Index +Wind                                                                              | 510.36 | 10.13 |
| HLC ~ 1 + Temperature + Temperature^2 + Rain lag 1 + Rain lag 1^2                                                           | 510.40 | 10.06 |
| HLC ~ 1 + Temperature + Rain Index +Wind                                                                                    | 510.41 | 10.21 |
| HLC ~ 1 + Eggs/site/day +Site+ Temperature lag 2+ Temperature lag 2^2 + Rain lag 3 + Rain lag 3^2                           | 510.49 | 8.81  |
| HLC ~ 1 + Temperature + Rain lag 2 +Wind                                                                                    | 510.53 | 10.32 |
| HLC ~ 1 + Temperature + Rain lag 3+Wind                                                                                     | 510.53 | 10.24 |
| HLC ~ 1 + Temperature + Temperature^2 + Rain lag 3 + Rain lag 3^2+Wind                                                      | 510.57 | 8.60  |
| HLC ~ 1 +Site+ Temperature lag 1+ Temperature lag 1^2 +Wind                                                                 | 510.57 | 9.21  |
| HLC ~ 1 +Site+ Rain lag 1                                                                                                   | 510.60 | 10.37 |
| HLC ~ 1 + Eggs/site/day +Site+ Temperature lag 3+ Temperature lag 3^2 + Rain lag 3 + Rain lag 3^2                           | 510.65 | 8.91  |
| HLC ~ 1 + Temperature lag 1 + Rain lag 3+Wind                                                                               | 510.66 | 10.05 |
| HLC ~ 1 + Eggs/site/day + Eggs/site/day:Site+Site+ Temperature lag 2+ Temperature lag 2^2 + Rain lag 1 + Rain lag 1^2 +Wind | 510.67 | 8.27  |
| HLC ~ 1 + Temperature lag 1 + Rain lag 2 +Wind                                                                              | 510.74 | 10.16 |
| HLC ~ 1 + Temperature lag 1 + Rain lag 3                                                                                    | 510.74 | 10.36 |
| HLC ~ 1 + Temperature lag 1 + Rain lag 2                                                                                    | 510.76 | 10.41 |
| HLC ~ 1 +Site+ Temperature + Temperature^2 + Rain lag 2 +Wind                                                               | 510.77 | 8.95  |
| HLC ~ 1 + Temperature lag 2+ Temperature lag 2^2                                                                            | 510.89 | 10.01 |
| HLC ~ 1 + Temperature + Rain lag 2 + Rain lag 2^2                                                                           | 510.94 | 10.54 |
| HLC ~ 1 + Temperature lag 2+ Temperature lag 2^2 +Wind                                                                      | 510.96 | 9.65  |
| HLC ~ 1 + Temperature lag 1+ Temperature lag 1^2 + Rain lag 3+Wind                                                          | 510.97 | 9.09  |
| HLC ~ 1 + Temperature lag 2 + Rain Index                                                                                    | 510.98 | 10.40 |
| HLC ~ 1 + Eggs/site/day + Eggs/site/day:Site+Site+ Temperature + Rain lag 3 + Rain lag 3^2+Wind                             | 510.99 | 8.90  |
| HLC ~ 1 +Site+ Temperature + Rain lag 1 +Wind                                                                               | 511.00 | 10.32 |
| HLC ~ 1 + Eggs/site/day + Eggs/site/day:Site+Site+ Temperature lag 2+ Temperature lag 2^2 + Rain lag 1 + Rain lag 1^2       | 511.03 | 8.66  |
| HLC ~ 1 +Site+ Temperature lag 1+ Temperature lag 1^2                                                                       | 511.05 | 9.61  |
| HLC ~ 1 +Site+ Temperature lag 2                                                                                            | 511.05 | 10.22 |
| HLC ~ 1 +Site+ Temperature lag 1 + Rain Index                                                                               | 511.09 | 10.09 |
| HLC ~ 1 + Temperature lag 3 + Rain Index                                                                                    | 511.09 | 10.41 |
| HLC ~ 1 +Site+ Rain lag 2                                                                                                   | 511.10 | 10.26 |
| HLC ~ 1 +Site+ Temperature lag 3                                                                                            | 511.11 | 10.24 |
| HLC ~ 1 + Eggs/site/day + Eggs/site/day:Site+Site+ Temperature lag 3 + Rain lag 3 + Rain lag 3^2                            | 511.11 | 9.13  |
| HLC ~ 1 +Site+ Rain lag 3                                                                                                   | 511.11 | 10.29 |
| HLC ~ 1 + Eggs/site/day + Eggs/site/day:Site+Site+ Temperature lag 3 + Rain lag 3 + Rain lag 3^2+Wind                       | 511.15 | 8.78  |

|                                                                                                                             |        |       |
|-----------------------------------------------------------------------------------------------------------------------------|--------|-------|
| HLC ~ 1 + Eggs/site/day + Eggs/site/day:Site+Site+ Temperature lag 3+ Temperature lag 3^2 + Rain lag 1 + Rain lag 1^2 +Wind | 511.16 | 8.41  |
| HLC ~ 1 +Site+ Rain lag 1 +Wind                                                                                             | 511.16 | 10.12 |
| HLC ~ 1 + Eggs/site/day + Eggs/site/day:Site+Site+ Temperature lag 3 + Rain lag 2 + Rain lag 2^2                            | 511.18 | 9.07  |
| HLC ~ 1 + Temperature lag 1+ Temperature lag 1^2 + Rain Index                                                               | 511.19 | 9.86  |
| HLC ~ 1 + Eggs/site/day + Eggs/site/day:Site+Site+ Temperature lag 1 + Rain lag 3 + Rain lag 3^2+Wind                       | 511.19 | 8.82  |
| HLC ~ 1 + Temperature lag 3+ Temperature lag 3^2                                                                            | 511.22 | 10.08 |
| HLC ~ 1 + Temperature + Temperature^2 + Rain lag 2 + Rain lag 2^2                                                           | 511.23 | 9.68  |
| HLC ~ 1 + Eggs/site/day + Eggs/site/day:Site+Site+ Temperature lag 2 + Rain lag 3 + Rain lag 3^2                            | 511.24 | 9.14  |
| HLC ~ 1 + Temperature lag 2 + Rain lag 1                                                                                    | 511.26 | 10.59 |
| HLC ~ 1 + Temperature lag 1+ Temperature lag 1^2 + Rain lag 2 +Wind                                                         | 511.27 | 9.20  |
| HLC ~ 1 + Eggs/site/day + Eggs/site/day:Site+Site+ Temperature lag 2 + Rain lag 2 + Rain lag 2^2                            | 511.29 | 9.06  |
| HLC ~ 1 + Eggs/site/day + Eggs/site/day:Site+Site+ Temperature lag 1 + Rain lag 2 + Rain lag 2^2                            | 511.31 | 9.12  |
| HLC ~ 1 + Rain lag 1 + Rain lag 1^2                                                                                         | 511.32 | 10.56 |
| HLC ~ 1 + Eggs/site/day + Eggs/site/day:Site+Site+ Temperature lag 2 + Rain lag 3 + Rain lag 3^2+Wind                       | 511.33 | 8.79  |
| HLC ~ 1 +Site+ Temperature + Temperature^2 + Rain lag 3 + Rain lag 3^2                                                      | 511.34 | 8.98  |
| HLC ~ 1 + Eggs/site/day + Eggs/site/day:Site+Site+ Temperature + Rain lag 2 + Rain lag 2^2 +Wind                            | 511.34 | 8.98  |
| HLC ~ 1 + Temperature lag 3+ Temperature lag 3^2 +Wind                                                                      | 511.35 | 9.68  |
| HLC ~ 1 +Site+ Temperature + Rain lag 1 + Rain lag 1^2                                                                      | 511.36 | 10.49 |
| HLC ~ 1 + Temperature lag 3 + Rain lag 1                                                                                    | 511.36 | 10.60 |
| HLC ~ 1 + Eggs/site/day + Eggs/site/day:Site+Site+ Temperature lag 1 + Rain lag 2 + Rain lag 2^2 +Wind                      | 511.37 | 8.90  |
| HLC ~ 1 + Rain lag 3 + Rain lag 3^2                                                                                         | 511.39 | 10.34 |
| HLC ~ 1 + Eggs/site/day + Eggs/site/day:Site+Site+ Temperature lag 3+ Temperature lag 3^2 + Rain lag 1 + Rain lag 1^2       | 511.41 | 8.83  |
| HLC ~ 1 +Site+ Temperature lag 2 +Wind                                                                                      | 511.41 | 9.96  |
| HLC ~ 1 +Site+ Temperature + Temperature^2 + Rain lag 1 +Wind                                                               | 511.41 | 9.70  |
| HLC ~ 1 + Eggs/site/day + Eggs/site/day:Site+Site+ Temperature lag 1 + Rain lag 3 + Rain lag 3^2                            | 511.43 | 9.16  |
| HLC ~ 1 +Site+ Temperature + Temperature^2 + Rain lag 3 + Rain lag 3^2+Wind                                                 | 511.45 | 8.34  |
| HLC ~ 1 +Site+ Rain Index +Wind                                                                                             | 511.46 | 9.99  |
| HLC ~ 1 + Temperature lag 1+ Temperature lag 1^2 + Rain lag 1 +Wind                                                         | 511.48 | 9.64  |
| HLC ~ 1 +Site+ Temperature + Temperature^2 + Rain Index +Wind                                                               | 511.49 | 9.19  |
| HLC ~ 1 + Eggs/site/day + Eggs/site/day:Site+Site+ Temperature lag 2+ Temperature lag 2^2 + Rain lag 2 + Rain lag 2^2       | 511.51 | 8.41  |
| HLC ~ 1 + Eggs/site/day + Eggs/site/day:Site+Site+ Temperature lag 2+ Temperature lag 2^2 + Rain lag 2 + Rain lag 2^2 +Wind | 511.52 | 8.09  |
| HLC ~ 1 + Eggs/site/day + Eggs/site/day:Site+Site+ Temperature lag 3 + Rain lag 2 + Rain lag 2^2 +Wind                      | 511.55 | 8.83  |
| HLC ~ 1 + Temperature lag 1+ Temperature lag 1^2 + Rain Index +Wind                                                         | 511.57 | 9.46  |
| HLC ~ 1 +Site+ Temperature lag 3 +Wind                                                                                      | 511.59 | 9.99  |
| HLC ~ 1 +Site+ Rain lag 2 +Wind                                                                                             | 511.63 | 10.00 |

|                                                                                                                                                   |        |       |
|---------------------------------------------------------------------------------------------------------------------------------------------------|--------|-------|
| HLC ~ 1 +Site+ Rain lag 3+Wind                                                                                                                    | 511.64 | 10.02 |
| HLC ~ 1 + Temperature lag 2 + Rain lag 1 +Wind                                                                                                    | 511.65 | 10.36 |
| HLC ~ 1 + Rain lag 3 + Rain lag 3 <sup>2</sup> +Wind                                                                                              | 511.68 | 10.02 |
| HLC ~ 1 + Eggs/site/day + Eggs/site/day:Site+Site+ Temperature lag 2 + Rain lag 2 + Rain lag 2 <sup>2</sup> +Wind                                 | 511.69 | 8.84  |
| HLC ~ 1 + Temperature lag 1+ Temperature lag 1 <sup>2</sup> + Rain lag 1                                                                          | 511.77 | 10.03 |
| HLC ~ 1 + Temperature lag 1+ Temperature lag 1 <sup>2</sup> + Rain lag 3                                                                          | 511.77 | 9.67  |
| HLC ~ 1 + Temperature + Rain lag 1 + Rain lag 1 <sup>2</sup> +Wind                                                                                | 511.77 | 10.53 |
| HLC ~ 1 +Site+ Temperature lag 1 + Rain lag 1                                                                                                     | 511.78 | 10.32 |
| HLC ~ 1 + Rain lag 2 + Rain lag 2 <sup>2</sup>                                                                                                    | 511.78 | 10.47 |
| HLC ~ 1 +Site+ Temperature lag 1 + Rain lag 1 +Wind                                                                                               | 511.81 | 10.07 |
| HLC ~ 1 + Temperature lag 1+ Temperature lag 1 <sup>2</sup> + Rain lag 2                                                                          | 511.83 | 9.69  |
| HLC ~ 1 + Temperature lag 2 + Rain lag 3                                                                                                          | 511.84 | 10.50 |
| HLC ~ 1 + Temperature lag 2 + Rain lag 2                                                                                                          | 511.85 | 10.49 |
| HLC ~ 1 + Temperature lag 3 + Rain lag 3                                                                                                          | 511.89 | 10.52 |
| HLC ~ 1 + Temperature lag 3 + Rain lag 2                                                                                                          | 511.89 | 10.49 |
| HLC ~ 1 +Site+ Temperature + Rain lag 3 + Rain lag 3 <sup>2</sup>                                                                                 | 511.90 | 10.07 |
| HLC ~ 1 + Rain lag 1 + Rain lag 1 <sup>2</sup> +Wind                                                                                              | 511.92 | 10.32 |
| HLC ~ 1 + Temperature lag 3 + Rain lag 1 +Wind                                                                                                    | 511.94 | 10.35 |
| HLC ~ 1 +Site+ Temperature lag 1 + Rain Index +Wind                                                                                               | 511.97 | 9.89  |
| HLC ~ 1 + Eggs/site/day + Eggs/site/day:Site+Site+ Temperature lag 2+ Temperature lag 2 <sup>2</sup> + Rain lag 3 + Rain lag 3 <sup>2</sup> +Wind | 511.97 | 8.27  |
| HLC ~ 1 + Rain lag 2 + Rain lag 2 <sup>2</sup> +Wind                                                                                              | 511.99 | 10.20 |
| HLC ~ 1 +Site+ Temperature + Temperature <sup>2</sup> + Rain lag 1 + Rain lag 1 <sup>2</sup>                                                      | 512.01 | 9.89  |
| HLC ~ 1 + Eggs/site/day + Eggs/site/day:Site+Site+ Temperature lag 3+ Temperature lag 3 <sup>2</sup> + Rain lag 3 + Rain lag 3 <sup>2</sup> +Wind | 512.02 | 8.25  |
| HLC ~ 1 + Eggs/site/day + Eggs/site/day:Site+Site+ Temperature lag 3+ Temperature lag 3 <sup>2</sup> + Rain lag 2 + Rain lag 2 <sup>2</sup> +Wind | 512.03 | 8.22  |
| HLC ~ 1 + Temperature lag 2 + Rain Index +Wind                                                                                                    | 512.03 | 10.20 |
| HLC ~ 1 +Site+ Temperature + Rain Index +Wind                                                                                                     | 512.03 | 9.97  |
| HLC ~ 1 + Temperature + Temperature <sup>2</sup> + Rain lag 1 + Rain lag 1 <sup>2</sup> +Wind                                                     | 512.04 | 9.66  |
| HLC ~ 1 + Temperature + Rain lag 3 + Rain lag 3 <sup>2</sup> +Wind                                                                                | 512.05 | 10.06 |
| HLC ~ 1 +Site+ Temperature lag 1+ Temperature lag 1 <sup>2</sup> + Rain lag 3+Wind                                                                | 512.13 | 8.91  |
| HLC ~ 1 + Eggs/site/day + Eggs/site/day:Site+Site+ Temperature lag 3+ Temperature lag 3 <sup>2</sup> + Rain lag 2 + Rain lag 2 <sup>2</sup>       | 512.14 | 8.59  |
| HLC ~ 1 +Site+ Temperature + Rain lag 3+Wind                                                                                                      | 512.14 | 10.04 |
| HLC ~ 1 +Site+ Temperature + Rain lag 2 +Wind                                                                                                     | 512.16 | 10.13 |
| HLC ~ 1 + Temperature lag 3 + Rain Index +Wind                                                                                                    | 512.24 | 10.22 |
| HLC ~ 1 +Site+ Temperature lag 1 + Rain lag 3+Wind                                                                                                | 512.24 | 9.83  |
| HLC ~ 1 + Temperature lag 2 + Rain lag 3+Wind                                                                                                     | 512.25 | 10.22 |
| HLC ~ 1 + Temperature lag 2 + Rain lag 2 +Wind                                                                                                    | 512.25 | 10.25 |
| HLC ~ 1 + Temperature lag 1+ Temperature lag 1 <sup>2</sup> + Rain lag 3 + Rain lag 3 <sup>2</sup> +Wind                                          | 512.29 | 8.73  |
| HLC ~ 1 + Temperature + Temperature <sup>2</sup> + Rain lag 2 + Rain lag 2 <sup>2</sup> +Wind                                                     | 512.29 | 9.17  |
| HLC ~ 1 +Site+ Temperature lag 1 + Rain lag 3                                                                                                     | 512.31 | 10.15 |
| HLC ~ 1 +Site+ Temperature lag 1 + Rain lag 2                                                                                                     | 512.34 | 10.21 |
| HLC ~ 1 +Site+ Temperature lag 1 + Rain lag 2 +Wind                                                                                               | 512.34 | 9.95  |
| HLC ~ 1 +Site+ Temperature lag 2+ Temperature lag 2 <sup>2</sup>                                                                                  | 512.36 | 9.82  |

|                                                                                                                       |        |       |
|-----------------------------------------------------------------------------------------------------------------------|--------|-------|
| HLC ~ 1 +Site+ Temperature lag 2+ Temperature lag 2^2 +Wind                                                           | 512.40 | 9.45  |
| HLC ~ 1 + Temperature lag 3 + Rain lag 2 +Wind                                                                        | 512.43 | 10.25 |
| HLC ~ 1 + Temperature lag 3 + Rain lag 3+Wind                                                                         | 512.43 | 10.25 |
| HLC ~ 1 +Site+ Temperature lag 1+ Temperature lag 1^2 + Rain lag 2 +Wind                                              | 512.46 | 9.04  |
| HLC ~ 1 + Eggs/site/day + Eggs/site/day:Site+Site+ Temperature lag 2+ Temperature lag 2^2 + Rain lag 3 + Rain lag 3^2 | 512.47 | 8.75  |
| HLC ~ 1 + Temperature lag 1 + Rain lag 1 + Rain lag 1^2                                                               | 512.48 | 10.50 |
| HLC ~ 1 + Temperature lag 1 + Rain lag 1 + Rain lag 1^2 +Wind                                                         | 512.53 | 10.25 |
| HLC ~ 1 +Site+ Temperature lag 2 + Rain Index                                                                         | 512.55 | 10.17 |
| HLC ~ 1 + Temperature lag 2+ Temperature lag 2^2 + Rain Index                                                         | 512.59 | 10.00 |
| HLC ~ 1 +Site+ Temperature + Rain lag 2 + Rain lag 2^2                                                                | 512.62 | 10.37 |
| HLC ~ 1 +Site+ Temperature + Temperature^2 + Rain lag 2 + Rain lag 2^2                                                | 512.64 | 9.54  |
| HLC ~ 1 +Site+ Temperature lag 1+ Temperature lag 1^2 + Rain Index                                                    | 512.66 | 9.68  |
| HLC ~ 1 +Site+ Temperature lag 3 + Rain Index                                                                         | 512.66 | 10.19 |
| HLC ~ 1 +Site+ Temperature lag 3+ Temperature lag 3^2                                                                 | 512.67 | 9.94  |
| HLC ~ 1 + Eggs/site/day + Eggs/site/day:Site+Site+ Temperature lag 3+ Temperature lag 3^2 + Rain lag 3 + Rain lag 3^2 | 512.68 | 8.83  |
| HLC ~ 1 + Temperature + Rain lag 2 + Rain lag 2^2 +Wind                                                               | 512.71 | 10.34 |
| HLC ~ 1 + Temperature lag 3+ Temperature lag 3^2 + Rain Index                                                         | 512.74 | 9.99  |
| HLC ~ 1 + Temperature lag 1 + Rain lag 3 + Rain lag 3^2+Wind                                                          | 512.76 | 9.94  |
| HLC ~ 1 +Site+ Temperature lag 3+ Temperature lag 3^2 +Wind                                                           | 512.76 | 9.50  |
| HLC ~ 1 +Site+ Temperature lag 2 + Rain lag 1                                                                         | 512.87 | 10.38 |
| HLC ~ 1 + Temperature lag 1 + Rain lag 3 + Rain lag 3^2                                                               | 512.91 | 10.28 |
| HLC ~ 1 +Site+ Rain lag 1 + Rain lag 1^2                                                                              | 512.92 | 10.35 |
| HLC ~ 1 + Temperature lag 1 + Rain lag 2 + Rain lag 2^2 +Wind                                                         | 512.93 | 10.18 |
| HLC ~ 1 +Site+ Rain lag 3 + Rain lag 3^2                                                                              | 512.94 | 10.14 |
| HLC ~ 1 +Site+ Temperature lag 1+ Temperature lag 1^2 + Rain lag 1 +Wind                                              | 512.96 | 9.47  |
| HLC ~ 1 + Temperature lag 2+ Temperature lag 2^2 + Rain lag 1                                                         | 512.97 | 10.21 |
| HLC ~ 1 +Site+ Temperature lag 3 + Rain lag 1                                                                         | 512.97 | 10.40 |
| HLC ~ 1 +Site+ Temperature lag 1+ Temperature lag 1^2 + Rain Index +Wind                                              | 513.01 | 9.26  |
| HLC ~ 1 + Temperature lag 1 + Rain lag 2 + Rain lag 2^2                                                               | 513.11 | 10.42 |
| HLC ~ 1 +Site+ Temperature lag 1+ Temperature lag 1^2 + Rain lag 3                                                    | 513.13 | 9.51  |
| HLC ~ 1 + Temperature lag 2+ Temperature lag 2^2 + Rain lag 1 +Wind                                                   | 513.16 | 9.86  |
| HLC ~ 1 +Site+ Temperature lag 1+ Temperature lag 1^2 + Rain lag 2                                                    | 513.18 | 9.56  |
| HLC ~ 1 + Temperature lag 2+ Temperature lag 2^2 + Rain lag 2                                                         | 513.20 | 10.00 |
| HLC ~ 1 +Site+ Temperature lag 1+ Temperature lag 1^2 + Rain lag 3 + Rain lag 3^2+Wind                                | 513.22 | 8.51  |
| HLC ~ 1 +Site+ Rain lag 3 + Rain lag 3^2+Wind                                                                         | 513.23 | 9.80  |
| HLC ~ 1 + Temperature lag 2+ Temperature lag 2^2 + Rain lag 3                                                         | 513.24 | 10.04 |
| HLC ~ 1 + Temperature lag 3+ Temperature lag 3^2 + Rain lag 3+Wind                                                    | 513.27 | 9.47  |
| HLC ~ 1 + Temperature lag 2+ Temperature lag 2^2 + Rain lag 3+Wind                                                    | 513.27 | 9.60  |
| HLC ~ 1 + Temperature lag 2+ Temperature lag 2^2 + Rain lag 2 +Wind                                                   | 513.28 | 9.60  |
| HLC ~ 1 +Site+ Temperature lag 1+ Temperature lag 1^2 + Rain lag 1                                                    | 513.28 | 9.88  |
| HLC ~ 1 +Site+ Temperature lag 2 + Rain lag 1 +Wind                                                                   | 513.29 | 10.14 |
| HLC ~ 1 + Temperature lag 2+ Temperature lag 2^2 + Rain Index +Wind                                                   | 513.32 | 9.67  |
| HLC ~ 1 +Site+ Temperature + Temperature^2 + Rain lag 2 + Rain lag 2^2 +Wind                                          | 513.35 | 9.02  |
| HLC ~ 1 + Temperature lag 3+ Temperature lag 3^2 + Rain lag 1                                                         | 513.37 | 10.37 |



|                                                                                    |        |       |
|------------------------------------------------------------------------------------|--------|-------|
| HLC ~ 1 +Site+ Rain lag 2 + Rain lag 2^2                                           | 513.37 | 10.27 |
| HLC ~ 1 + Temperature lag 3+ Temperature lag 3^2 + Rain lag 2 +Wind                | 513.42 | 9.54  |
| HLC ~ 1 + Temperature lag 3+ Temperature lag 3^2 + Rain lag 3                      | 513.42 | 10.08 |
| HLC ~ 1 + Temperature lag 3+ Temperature lag 3^2 + Rain lag 2                      | 513.43 | 10.05 |
| HLC ~ 1 +Site+ Temperature lag 2 + Rain lag 2                                      | 513.43 | 10.29 |
| HLC ~ 1 +Site+ Temperature lag 2 + Rain lag 3                                      | 513.43 | 10.30 |
| HLC ~ 1 +Site+ Temperature lag 3 + Rain lag 2                                      | 513.48 | 10.31 |
| HLC ~ 1 +Site+ Temperature lag 3 + Rain lag 3                                      | 513.48 | 10.33 |
| HLC ~ 1 + Temperature lag 1+ Temperature lag 1^2 + Rain lag 2 + Rain lag 2^2 +Wind | 513.50 | 9.19  |
| HLC ~ 1 +Site+ Temperature + Rain lag 1 + Rain lag 1^2 +Wind                       | 513.53 | 10.34 |
| HLC ~ 1 +Site+ Rain lag 1 + Rain lag 1^2 +Wind                                     | 513.56 | 10.10 |
| HLC ~ 1 +Site+ Temperature lag 3 + Rain lag 1 +Wind                                | 513.57 | 10.14 |
| HLC ~ 1 +Site+ Temperature + Temperature^2 + Rain lag 1 + Rain lag 1^2 +Wind       | 513.57 | 9.49  |
| HLC ~ 1 + Temperature lag 2 + Rain lag 1 + Rain lag 1^2                            | 513.59 | 10.57 |
| HLC ~ 1 + Temperature lag 1+ Temperature lag 1^2 + Rain lag 3 + Rain lag 3^2       | 513.59 | 9.44  |
| HLC ~ 1 +Site+ Rain lag 2 + Rain lag 2^2 +Wind                                     | 513.61 | 10.00 |
| HLC ~ 1 + Temperature lag 3+ Temperature lag 3^2 + Rain Index +Wind                | 513.62 | 9.67  |
| HLC ~ 1 +Site+ Temperature lag 2 + Rain Index +Wind                                | 513.63 | 9.97  |
| HLC ~ 1 + Temperature lag 3+ Temperature lag 3^2 + Rain lag 1 +Wind                | 513.68 | 9.93  |
| HLC ~ 1 + Temperature lag 3 + Rain lag 1 + Rain lag 1^2                            | 513.70 | 10.58 |
| HLC ~ 1 +Site+ Temperature + Rain lag 3 + Rain lag 3^2+Wind                        | 513.70 | 9.85  |
| HLC ~ 1 + Temperature lag 2 + Rain lag 3 + Rain lag 3^2                            | 513.74 | 10.36 |
| HLC ~ 1 + Temperature lag 1+ Temperature lag 1^2 + Rain lag 1 + Rain lag 1^2 +Wind | 513.76 | 9.51  |
| HLC ~ 1 + Temperature lag 3 + Rain lag 3 + Rain lag 3^2                            | 513.77 | 10.38 |
| HLC ~ 1 +Site+ Temperature lag 3 + Rain Index +Wind                                | 513.85 | 9.99  |
| HLC ~ 1 +Site+ Temperature lag 2 + Rain lag 3+Wind                                 | 513.85 | 10.01 |
| HLC ~ 1 +Site+ Temperature lag 2 + Rain lag 2 +Wind                                | 513.86 | 10.05 |
| HLC ~ 1 + Temperature lag 2 + Rain lag 3 + Rain lag 3^2+Wind                       | 513.95 | 10.03 |
| HLC ~ 1 + Temperature lag 1+ Temperature lag 1^2 + Rain lag 1 + Rain lag 1^2       | 514.03 | 9.93  |
| HLC ~ 1 +Site+ Temperature lag 3 + Rain lag 2 +Wind                                | 514.03 | 10.05 |
| HLC ~ 1 + Temperature lag 2 + Rain lag 1 + Rain lag 1^2 +Wind                      | 514.04 | 10.33 |
| HLC ~ 1 +Site+ Temperature lag 3 + Rain lag 3+Wind                                 | 514.04 | 10.05 |
| HLC ~ 1 + Temperature lag 3 + Rain lag 3 + Rain lag 3^2+Wind                       | 514.11 | 10.06 |
| HLC ~ 1 + Temperature lag 2 + Rain lag 2 + Rain lag 2^2                            | 514.12 | 10.50 |
| HLC ~ 1 +Site+ Temperature lag 2+ Temperature lag 2^2 + Rain Index                 | 514.12 | 9.81  |
| HLC ~ 1 +Site+ Temperature lag 1 + Rain lag 1 + Rain lag 1^2                       | 514.15 | 10.28 |
| HLC ~ 1 + Temperature lag 3 + Rain lag 2 + Rain lag 2^2                            | 514.16 | 10.50 |
| HLC ~ 1 +Site+ Temperature lag 3+ Temperature lag 3^2 + Rain Index                 | 514.22 | 9.84  |
| HLC ~ 1 + Temperature lag 2 + Rain lag 2 + Rain lag 2^2 +Wind                      | 514.23 | 10.26 |
| HLC ~ 1 +Site+ Temperature lag 1 + Rain lag 1 + Rain lag 1^2 +Wind                 | 514.23 | 10.03 |
| HLC ~ 1 + Temperature lag 1+ Temperature lag 1^2 + Rain lag 2 + Rain lag 2^2       | 514.26 | 9.70  |
| HLC ~ 1 + Temperature lag 3 + Rain lag 1 + Rain lag 1^2 +Wind                      | 514.33 | 10.33 |
| HLC ~ 1 +Site+ Temperature lag 1 + Rain lag 3 + Rain lag 3^2+Wind                  | 514.37 | 9.72  |
| HLC ~ 1 + Temperature lag 3 + Rain lag 2 + Rain lag 2^2 +Wind                      | 514.41 | 10.25 |
| HLC ~ 1 +Site+ Temperature + Rain lag 2 + Rain lag 2^2 +Wind                       | 514.43 | 10.17 |
| HLC ~ 1 +Site+ Temperature lag 3+ Temperature lag 3^2 + Rain lag 3+Wind            | 514.52 | 9.38  |

|                                                                                         |        |       |
|-----------------------------------------------------------------------------------------|--------|-------|
| HLC ~ 1 +Site+ Temperature lag 1 + Rain lag 3 + Rain lag 3^2                            | 514.53 | 10.07 |
| HLC ~ 1 +Site+ Temperature lag 2+ Temperature lag 2^2 + Rain lag 1                      | 514.55 | 10.04 |
| HLC ~ 1 +Site+ Temperature lag 1 + Rain lag 2 + Rain lag 2^2 +Wind                      | 514.61 | 9.99  |
| HLC ~ 1 +Site+ Temperature lag 3+ Temperature lag 3^2 + Rain lag 2 +Wind                | 514.66 | 9.45  |
| HLC ~ 1 +Site+ Temperature lag 2+ Temperature lag 2^2 + Rain lag 2                      | 514.70 | 9.84  |
| HLC ~ 1 +Site+ Temperature lag 2+ Temperature lag 2^2 + Rain lag 2 +Wind                | 514.71 | 9.45  |
| HLC ~ 1 +Site+ Temperature lag 2+ Temperature lag 2^2 + Rain lag 3+Wind                 | 514.71 | 9.44  |
| HLC ~ 1 +Site+ Temperature lag 2+ Temperature lag 2^2 + Rain lag 1 +Wind                | 514.72 | 9.68  |
| HLC ~ 1 +Site+ Temperature lag 2+ Temperature lag 2^2 + Rain lag 3                      | 514.76 | 9.88  |
| HLC ~ 1 +Site+ Temperature lag 1+ Temperature lag 1^2 + Rain lag 2 + Rain lag 2^2 +Wind | 514.77 | 9.06  |
| HLC ~ 1 +Site+ Temperature lag 1 + Rain lag 2 + Rain lag 2^2                            | 514.77 | 10.23 |
| HLC ~ 1 +Site+ Temperature lag 3+ Temperature lag 3^2 + Rain lag 2                      | 514.83 | 10.00 |
| HLC ~ 1 +Site+ Temperature lag 2+ Temperature lag 2^2 + Rain Index +Wind                | 514.84 | 9.47  |
| HLC ~ 1 +Site+ Temperature lag 3+ Temperature lag 3^2 + Rain lag 3                      | 514.84 | 10.06 |
| HLC ~ 1 +Site+ Temperature lag 1+ Temperature lag 1^2 + Rain lag 3 + Rain lag 3^2       | 514.90 | 9.27  |
| HLC ~ 1 +Site+ Temperature lag 3+ Temperature lag 3^2 + Rain lag 1                      | 514.93 | 10.28 |
| HLC ~ 1 +Site+ Temperature lag 3+ Temperature lag 3^2 + Rain Index +Wind                | 515.09 | 9.49  |
| HLC ~ 1 + Temperature lag 3+ Temperature lag 3^2 + Rain lag 3 + Rain lag 3^2+Wind       | 515.15 | 9.36  |
| HLC ~ 1 +Site+ Temperature lag 3+ Temperature lag 3^2 + Rain lag 1 +Wind                | 515.21 | 9.80  |
| HLC ~ 1 + Temperature lag 2+ Temperature lag 2^2 + Rain lag 3 + Rain lag 3^2+Wind       | 515.22 | 9.50  |
| HLC ~ 1 + Temperature lag 2+ Temperature lag 2^2 + Rain lag 1 + Rain lag 1^2            | 515.24 | 10.12 |
| HLC ~ 1 +Site+ Temperature lag 2 + Rain lag 1 + Rain lag 1^2                            | 515.26 | 10.35 |
| HLC ~ 1 +Site+ Temperature lag 1+ Temperature lag 1^2 + Rain lag 1 + Rain lag 1^2 +Wind | 515.27 | 9.34  |
| HLC ~ 1 + Temperature lag 2+ Temperature lag 2^2 + Rain lag 3 + Rain lag 3^2            | 515.35 | 9.97  |
| HLC ~ 1 +Site+ Temperature lag 2 + Rain lag 3 + Rain lag 3^2                            | 515.36 | 10.16 |
| HLC ~ 1 +Site+ Temperature lag 3 + Rain lag 1 + Rain lag 1^2                            | 515.37 | 10.37 |
| HLC ~ 1 +Site+ Temperature lag 3 + Rain lag 3 + Rain lag 3^2                            | 515.39 | 10.19 |
| HLC ~ 1 + Temperature lag 2+ Temperature lag 2^2 + Rain lag 1 + Rain lag 1^2 +Wind      | 515.44 | 9.74  |
| HLC ~ 1 + Temperature lag 3+ Temperature lag 3^2 + Rain lag 3 + Rain lag 3^2            | 515.47 | 10.01 |
| HLC ~ 1 +Site+ Temperature lag 2 + Rain lag 3 + Rain lag 3^2+Wind                       | 515.57 | 9.82  |
| HLC ~ 1 +Site+ Temperature lag 1+ Temperature lag 1^2 + Rain lag 1 + Rain lag 1^2       | 515.58 | 9.77  |
| HLC ~ 1 + Temperature lag 3+ Temperature lag 3^2 + Rain lag 1 + Rain lag 1^2            | 515.64 | 10.25 |
| HLC ~ 1 + Temperature lag 2+ Temperature lag 2^2 + Rain lag 2 + Rain lag 2^2            | 515.65 | 10.02 |
| HLC ~ 1 +Site+ Temperature lag 1+ Temperature lag 1^2 + Rain lag 2 + Rain lag 2^2       | 515.69 | 9.57  |
| HLC ~ 1 + Temperature lag 2+ Temperature lag 2^2 + Rain lag 2 + Rain lag 2^2 +Wind      | 515.70 | 9.71  |
| HLC ~ 1 +Site+ Temperature lag 3 + Rain lag 3 + Rain lag 3^2+Wind                       | 515.74 | 9.86  |
| HLC ~ 1 +Site+ Temperature lag 2 + Rain lag 1 + Rain lag 1^2 +Wind                      | 515.74 | 10.11 |
| HLC ~ 1 + Temperature lag 3+ Temperature lag 3^2 + Rain lag 2 + Rain lag 2^2 +Wind      | 515.76 | 9.66  |
| HLC ~ 1 +Site+ Temperature lag 2 + Rain lag 2 + Rain lag 2^2                            | 515.78 | 10.31 |
| HLC ~ 1 +Site+ Temperature lag 3 + Rain lag 2 + Rain lag 2^2                            | 515.82 | 10.32 |
| HLC ~ 1 + Temperature lag 3+ Temperature lag 3^2 + Rain lag 2 + Rain lag 2^2            | 515.86 | 10.12 |
| HLC ~ 1 + Temperature lag 3+ Temperature lag 3^2 + Rain lag 1 + Rain lag 1^2 +Wind      | 515.91 | 9.77  |
| HLC ~ 1 +Site+ Temperature lag 2 + Rain lag 2 + Rain lag 2^2 +Wind                      | 515.93 | 10.08 |
| HLC ~ 1 +Site+ Temperature lag 3 + Rain lag 1 + Rain lag 1^2 +Wind                      | 516.04 | 10.12 |
| HLC ~ 1 +Site+ Temperature lag 3 + Rain lag 2 + Rain lag 2^2 +Wind                      | 516.10 | 10.07 |
| HLC ~ 1 +Site+ Temperature lag 3+ Temperature lag 3^2 + Rain lag 3 + Rain lag 3^2+Wind  | 516.43 | 9.24  |

|                                                                                                               |        |       |
|---------------------------------------------------------------------------------------------------------------|--------|-------|
| HLC ~ 1 +Site+ Temperature lag 2+ Temperature lag 2 <sup>2</sup> + Rain lag 3 + Rain lag 3 <sup>2</sup> +Wind | 516.69 | 9.32  |
| HLC ~ 1 +Site+ Temperature lag 2+ Temperature lag 2 <sup>2</sup> + Rain lag 1 + Rain lag 1 <sup>2</sup>       | 516.87 | 9.95  |
| HLC ~ 1 +Site+ Temperature lag 2+ Temperature lag 2 <sup>2</sup> + Rain lag 3 + Rain lag 3 <sup>2</sup>       | 516.92 | 9.81  |
| HLC ~ 1 +Site+ Temperature lag 3+ Temperature lag 3 <sup>2</sup> + Rain lag 3 + Rain lag 3 <sup>2</sup>       | 516.94 | 9.97  |
| HLC ~ 1 +Site+ Temperature lag 2+ Temperature lag 2 <sup>2</sup> + Rain lag 1 + Rain lag 1 <sup>2</sup> +Wind | 517.03 | 9.56  |
| HLC ~ 1 +Site+ Temperature lag 3+ Temperature lag 3 <sup>2</sup> + Rain lag 2 + Rain lag 2 <sup>2</sup> +Wind | 517.14 | 9.60  |
| HLC ~ 1 +Site+ Temperature lag 2+ Temperature lag 2 <sup>2</sup> + Rain lag 2 + Rain lag 2 <sup>2</sup>       | 517.23 | 9.89  |
| HLC ~ 1 +Site+ Temperature lag 3+ Temperature lag 3 <sup>2</sup> + Rain lag 1 + Rain lag 1 <sup>2</sup>       | 517.24 | 10.18 |
| HLC ~ 1 +Site+ Temperature lag 2+ Temperature lag 2 <sup>2</sup> + Rain lag 2 + Rain lag 2 <sup>2</sup> +Wind | 517.24 | 9.59  |
| HLC ~ 1 +Site+ Temperature lag 3+ Temperature lag 3 <sup>2</sup> + Rain lag 2 + Rain lag 2 <sup>2</sup>       | 517.35 | 10.08 |
| HLC ~ 1 +Site+ Temperature lag 3+ Temperature lag 3 <sup>2</sup> + Rain lag 1 + Rain lag 1 <sup>2</sup> +Wind | 517.44 | 9.65  |
